# Supplementary material
Source: PubMed Central journal article supplement (PMC4345554)

## Supplementary Information

### **Metabolic theory predicts whole-ecosystem properties**

John R. Schramski, Anthony I. Dell, John M. Grady, Richard M. Sibly and James H. Brown

**This PDF file includes:**

Materials and Methods

Table S1

Table S2

Table S3

Figure S1

## Materials and Methods

### 1. Proof of Equation 1 (main text)

Here we show that the average residence time of carbon molecules within an ecosystem at equilibrium is proportional to its total biomass divided by *GPP*. We assume that *GPP* is measured by the number ( $P$ ) of carbon molecules entering the system every second, and that total biomass is measured as the total number ( $B$ ) of carbon molecules in the ecosystem. We work in discrete time in seconds though the proof can be made general.

Of the  $P$  molecules entering the system every second, let the proportion staying in the system for time  $t$  and then leaving be  $p_\tau$ , for  $\tau = 1, 2, 3, \dots T$  seconds. The number of molecules in the system that entered 1 s ago and stay for 1 s or more is  $P(p_1 + p_2 + p_3 + \dots + p_\tau + \dots + p_T)$ ,  $= P$ . The number that entered 2 s ago and stay 2 s or more is  $P(p_2 + p_3 + \dots + p_\tau + \dots + p_T)$ . This is less than  $P$  because  $Pp_1$  molecules, that entered 2 s ago, have now left the system. The number that entered 3 s ago and stay 3 s or more is  $P(p_3 + \dots + p_\tau + \dots + p_T)$ , and so on up until the oldest molecules in the system which entered  $T$  s ago. Addition gives the total number of molecules in the system as

$$\begin{aligned}
 & P(p_1 + p_2 + p_3 + \dots + p_\tau + \dots + p_T) \\
 & + \quad P(p_2 + p_3 + \dots + p_\tau + \dots + p_T) \\
 & + \quad \quad P(p_3 + \dots + p_\tau + \dots + p_T) \\
 & + \\
 & \dots \\
 & + \quad \quad \quad P(p_\tau + \dots + p_T) \\
 & + \\
 & \dots \\
 & + \quad \quad \quad \quad P(p_T) \\
 \\
 & = P(p_1 + 2p_2 + 3p_3 + \dots + \tau p_\tau + \dots + T p_T)
 \end{aligned}$$

So the total number of carbon molecules in the system ( $B$ ) is  $P \sum_\tau \tau p_\tau$ .  $\sum_\tau \tau p_\tau$  is by definition the average residence time of a carbon molecule in the system, and so average residence time =  $B/P$  (Eq. 1, main text).

### 2. Proof of Equation 7 (main text)

$TST_c$  is the sum of the flows through each compartment that have previously passed through them, and  $TST$  is given by Eq. 6 (main text). We assume there is just one compartment at each trophic level and that the flow from decomposers goes only to level 2. We define  $d_1$ ,  $d_2$  and  $P_2$  as in the main text, and write  $d_1 d_2 = d$ . Then to derive an equation for FCI we go through the compartments one at a time, calculating how much of their outflow returns to them. The outflow from decomposers is  $d(P + P_2 \frac{1-t^{n-1}}{1-t})$ , of which a proportion  $d_1$  returns directly to decomposers. A further proportion  $td_1$  returns to decomposers from level 3,  $t^2 d_1$  from level 4, and so on, giving in all

$$d(P + P_2 \frac{1-t^{n-1}}{1-t})d_1 \frac{1-t^{n-1}}{1-t} \tag{Eq. S1}$$

This is the flow through decomposers that has passed through them before.

The flow into level 2 is  $P_2$ , of which  $dP_2$  returns to level 2 directly,  $P_2td$  returns via level 3 and so on, giving a total of  $P_2d \frac{1-t^{n-1}}{1-t}$  for the flow through level 2 that has passed through level 2 before.

The flow into level 3 is  $P_2t$ , of which  $dt$  returns to level 3 without going through any higher level,  $t^2d$  returns via level 4 and so on, giving a total of  $P_2d(t^2 + t^3 + t^4 + \dots + t^{n-3})$ .

Similarly the flow into level 4 that has been there before is  $P_2d(t^4 + t^5 + t^6 + \dots + t^{n-4})$ , and so on, so the total for non-decomposers is

$$\frac{P_2d}{1-t} \left\{ \frac{1-t^{2n-2}}{1-t^2} - \frac{t^{n-1}-t^{2n-2}}{1-t} \right\} \quad \text{Eq. S2}$$

Adding together expressions S1 and S2 gives  $TST_c$  as

$$TST_c = \frac{d}{1-t} (Pd_1(1-t^{n-1}) + P_2 \left\{ d_1 \frac{(1-t^{n-1})^2}{1-t} + \frac{1-t^{2n-2}}{1-t^2} - \frac{t^{n-1}-t^{2n-2}}{1-t} \right\}) \quad \text{Eq. S3}$$

FCI can now be obtained as  $FCI = 100 \times TST_c / TST$ .

### 3. Proof that $FCI \sim 100 d_1 d_2 (d_1 + t)$ , when $t, d_1$ and $d_2$ are small (main text)

To first order in  $t, d_1$  and  $d_2$ , Eqs. 6 and 7 (main text) give

$$P_2 = Pt \quad \text{Eq. S4}$$

$$TST = P \quad \text{Eq. S5}$$

$$TST_c = d_1 d_2 (Pd_1 + Pt) \quad \text{Eq. S6}$$

It follows from Eq. S4 to S6 that  $FCI = 100 TST_c / TST \sim 100 d_1 d_2 (d_1 + t)$

**Table S1.** Summary parameter values for 37 ecological steady-state trophic networks we constructed (see Fig. 1 & 3). **Model** is model number (see Fig. 1, Fig. S1); **Hab** is habitat (T, terrestrial, M, pelagic marine); **PComp** is total number of primary producer compartments; **Comp** is total number of trophic compartments; **TL** is total number of trophic levels; **L/C** is linear (L, no recycling) or cyclic (C, with recycling); **Temp** is mean environmental temperature, and is assumed to approximately equal ectotherm body temperature (Kelvin); **GPP** is gross primary production (kg C/yr m<sup>2</sup>); **PMass** is mean size of an individual primary producer (kg C);  **$\beta$**  is the mass scaling exponent (see Eq. 3, main text); **TTE<sub>1-2</sub>** is trophic transfer efficiency from the first to second trophic level (all other TTE's = 0.1, except to and from decomposers [see]); **TTE<sub>d1</sub>** is trophic transfer efficiency to the decomposer compartment (if present); **TTE<sub>d2</sub>** is trophic transfer efficiency from the decomposer apartment (if present); **B<sub>eco</sub>** is total biomass of the ecosystem (kg C/m<sup>2</sup>);  **$\hat{t}_{eco}$**  is total residence time of carbon within the ecosystems (yr); **GPP/B<sub>eco</sub>** (yr); **FCI** is Finn Cycling Index; and **TST** is total systems throughput (kg C/yr m<sup>2</sup>). For additional details about each model see Fig. S1, or contact the corresponding author.

| Model | Hab | PComp | Comp | TL | L/C | Temp | GPP  | PMass    | $\beta$ | TTE <sub>1-2</sub> | TTE <sub>d1</sub> | TTE <sub>d2</sub> | B <sub>eco</sub> | $\hat{t}_{eco}$ | GPP/B <sub>eco</sub> | FCI   | TST   |
|-------|-----|-------|------|----|-----|------|------|----------|---------|--------------------|-------------------|-------------------|------------------|-----------------|----------------------|-------|-------|
| 1a    | T   | 1     | 4    | 4  | L   | 293  | 0.6  | 100      | 0.75    | 0.10               | 0.00              | 0.00              | 66.24            | 110.39          | 0.0091               | 0     | 0.667 |
| 1b    | T   | 1     | 4    | 4  | L   | 293  | 0.6  | 10       | 0.75    | 0.10               | 0.00              | 0.00              | 37.35            | 62.25           | 0.0161               | 0     | 0.667 |
| 1c    | T   | 1     | 4    | 4  | L   | 293  | 0.6  | 1        | 0.75    | 0.10               | 0.00              | 0.00              | 21.10            | 35.17           | 0.0284               | 0     | 0.667 |
| 1d    | T   | 1     | 4    | 4  | L   | 293  | 0.6  | 0.1      | 0.75    | 0.10               | 0.00              | 0.00              | 11.97            | 19.94           | 0.0501               | 0     | 0.667 |
| 1e    | T   | 1     | 4    | 4  | L   | 293  | 0.6  | 0.01     | 0.75    | 0.10               | 0.00              | 0.00              | 6.83             | 11.38           | 0.0879               | 0     | 0.667 |
| 1f    | T   | 1     | 4    | 4  | L   | 293  | 0.6  | 0.001    | 0.75    | 0.10               | 0.00              | 0.00              | 3.94             | 6.57            | 0.1523               | 0     | 0.667 |
| 1g    | T   | 1     | 4    | 4  | L   | 293  | 0.06 | 0.001    | 0.75    | 0.10               | 0.00              | 0.00              | 0.39             | 6.57            | 0.1523               | 0     | 0.067 |
| 1h    | T   | 1     | 4    | 4  | L   | 293  | 0.6  | 100      | 0.66    | 0.10               | 0.00              | 0.00              | 95.53            | 159.21          | 0.0063               | 0     | 0.667 |
| 1i    | T   | 1     | 4    | 4  | L   | 293  | 0.6  | 10       | 0.66    | 0.10               | 0.00              | 0.00              | 44.74            | 74.57           | 0.0134               | 0     | 0.667 |
| 1j    | T   | 1     | 4    | 4  | L   | 293  | 0.6  | 1        | 0.66    | 0.10               | 0.00              | 0.00              | 20.99            | 34.98           | 0.0286               | 0     | 0.667 |
| 1k    | T   | 1     | 4    | 4  | L   | 293  | 0.6  | 0.1      | 0.66    | 0.10               | 0.00              | 0.00              | 9.88             | 16.46           | 0.0607               | 0     | 0.667 |
| 1l    | T   | 1     | 4    | 4  | L   | 293  | 0.6  | 0.01     | 0.66    | 0.10               | 0.00              | 0.00              | 4.68             | 7.80            | 0.1282               | 0     | 0.667 |
| 1m    | T   | 1     | 4    | 4  | L   | 293  | 0.6  | 0.001    | 0.66    | 0.10               | 0.00              | 0.00              | 2.25             | 3.75            | 0.2667               | 0     | 0.667 |
| 1n    | T   | 1     | 4    | 4  | L   | 293  | 0.06 | 0.001    | 0.66    | 0.10               | 0.00              | 0.00              | 0.23             | 3.75            | 0.2667               | 0     | 0.067 |
| 2a    | T   | 1     | 5    | 4  | C   | 293  | 0.6  | 100      | 0.75    | 0.01               | 0.40              | 0.50              | 66.77            | 111.28          | 0.0090               | 10.77 | 1.200 |
| 2b    | T   | 1     | 5    | 4  | C   | 293  | 0.6  | 10       | 0.75    | 0.01               | 0.40              | 0.50              | 37.88            | 63.14           | 0.0158               | 10.77 | 1.200 |
| 2c    | T   | 1     | 5    | 4  | C   | 293  | 0.6  | 1        | 0.75    | 0.01               | 0.40              | 0.50              | 21.64            | 36.06           | 0.0277               | 10.77 | 1.200 |
| 2d    | T   | 1     | 5    | 4  | C   | 293  | 0.6  | 0.1      | 0.75    | 0.01               | 0.40              | 0.50              | 12.50            | 20.83           | 0.0480               | 10.77 | 1.200 |
| 2e    | T   | 1     | 5    | 4  | C   | 293  | 0.6  | 0.01     | 0.75    | 0.01               | 0.40              | 0.50              | 7.36             | 12.27           | 0.0815               | 10.77 | 1.200 |
| 2f    | T   | 1     | 5    | 4  | C   | 293  | 0.6  | 0.001    | 0.75    | 0.01               | 0.40              | 0.50              | 4.47             | 7.46            | 0.1341               | 10.77 | 1.200 |
| 2g    | T   | 1     | 5    | 4  | C   | 293  | 0.06 | 0.001    | 0.75    | 0.01               | 0.40              | 0.50              | 0.45             | 7.46            | 0.1341               | 10.77 | 0.120 |
| 2h    | T   | 1     | 5    | 4  | C   | 293  | 0.6  | 100      | 0.75    | 0.01               | 0.40              | 0.10              | 66.16            | 110.27          | 0.0091               | 1.61  | 0.951 |
| 3     | M   | 1     | 5    | 5  | L   | 293  | 0.6  | 1E-12    | 0.75    | 0.10               | 0.00              | 0.00              | 0.10             | 0.17            | 5.7488               | 0     | 0.667 |
| 4a    | M   | 1     | 6    | 5  | C   | 293  | 0.6  | 1E-12    | 0.75    | 0.10               | 0.40              | 0.50              | 0.35             | 0.60            | 1.6918               | 10.69 | 0.000 |
| 4b    | M   | 1     | 6    | 5  | C   | 293  | 0.06 | 1E-12    | 0.75    | 0.10               | 0.40              | 0.10              | 0.02             | 0.25            | 3.9206               | 1.67  | 0.000 |
| 5     | M   | 1     | 3    | 3  | L   | 293  | 0.6  | 1E-12    | 0.75    | 0.10               | 0.00              | 0.00              | 0.97             | 1.61            | 0.6204               | 0     | 0.666 |
| 6a    | M   | 1     | 4    | 3  | C   | 293  | 0.6  | 1E-12    | 0.75    | 0.10               | 0.40              | 0.50              | 3.69             | 6.16            | 0.1624               | 10.87 | 1.200 |
| 6b    | M   | 1     | 4    | 3  | C   | 280  | 0.6  | 1E-12    | 0.75    | 0.10               | 0.40              | 0.50              | 9.65             | 16.09           | 0.0622               | 10.87 | 1.200 |
| 6c    | M   | 1     | 4    | 3  | C   | 300  | 0.6  | 1E-12    | 0.75    | 0.10               | 0.40              | 0.50              | 2.53             | 4.21            | 0.2375               | 10.87 | 1.200 |
| 6d    | M   | 1     | 4    | 3  | C   | 293  | 0.6  | 1E-12    | 0.75    | 0.10               | 0.40              | 0.10              | 1.41             | 2.36            | 0.4243               | 1.53  | 0.972 |
| 7a    | T   | 2     | 7    | 5  | L   | 293  | 0.6  | 92.24    | 0.75    | 0.10               | 0.00              | 0.00              | 36.95            | 61.57           | 0.0162               | 0     | 0.666 |
| 7b    | T   | 2     | 7    | 5  | L   | 300  | 0.6  | 92.24    | 0.75    | 0.10               | 0.00              | 0.00              | 20.75            | 34.58           | 0.0289               | 0     | 0.666 |
| 7c    | T   | 2     | 7    | 5  | L   | 280  | 0.6  | 92.24    | 0.75    | 0.10               | 0.00              | 0.00              | 119.59           | 199.32          | 0.0050               | 0     | 0.666 |
| 8     | T   | 2     | 8    | 5  | C   | 293  | 0.6  | 92.24    | 0.75    | 0.10               | 0.40              | 0.50              | 37.62            | 62.71           | 0.0159               | 10.13 | 1.200 |
| 9     | T   | 1     | 6    | 5  | L   | 280  | 0.09 | 0.001    | 0.75    | 0.10               | 0.00              | 0.00              | 2.13             | 23.71           | 0.0422               | 0     | 0.100 |
| 10    | T   | 1     | 6    | 5  | L   | 280  | 0.09 | 10       | 0.75    | 0.10               | 0.00              | 0.00              | 18.69            | 207.63          | 0.0048               | 0     | 0.100 |
| 11a   | M   | 3     | 9    | 4  | L   | 293  | 0.6  | 1.25E-09 | 0.75    | 0.10               | 0.00              | 0.00              | 0.52             | 0.86            | 1.1604               | 0     | 0.666 |

**Table S2.** Empirical data for the body size dependence of carbon and nitrogen half-life within individual organisms (see Fig. 4A). **Taxa** is broad taxonomic group; **Mass** is wet mass of the entire organism (g); **Tissue type** is the tissue used to estimate half-life; **HL** is half-life (measured as the amount of time required for the stable-isotopic signature of the tissue to reach a midpoint value between the enriched and original value, see original sources for exact equations) (d); **HL15°C** is the temperature corrected half-life to 15°C, using Eq. 3 (main text); **Thermy** is 'Endo' for endotherm, and 'Ecto' for ectotherm; **Temp** is body temperature, for ectotherms it is assumed to be equivalent to environmental temperature and for endotherms 37°C; **Source** is data source from which data was obtained; and **Original Source** is the original source from which Source papers obtained data (see Table S3 for full citations).

| Element | Taxa | Species                         | Common name             | Mass  | Tissue type     | HL    | HL15°C     | Thermy | Temp | Source | Original source |
|---------|------|---------------------------------|-------------------------|-------|-----------------|-------|------------|--------|------|--------|-----------------|
| Carbon  | Bird | <i>Aythya valisineria</i>       | Canvasback              | 1248  | Blood           | 23    | 147.27873  | Endo   | 37   | [1]    | [2]             |
| Carbon  | Bird | <i>Calidris alpina pacifica</i> | Dunlin                  | 44    | Blood           | 11.2  | 71.71834   | Endo   | 37   | [3]    | [4]             |
| Carbon  | Bird | <i>Calidris alpina pacifica</i> | Dunlin                  | 56    | Blood           | 11.23 | 71.91044   | Endo   | 37   | [1]    | [4]             |
| Carbon  | Bird | <i>Catharacta skua</i>          | Great skua              | 970   | Blood           | 15.1  | 96.69169   | Endo   | 37   | [3]    | [5]             |
| Carbon  | Bird | <i>Corvus Brachyrhynchos</i>    | American crow           | 384.8 | Blood (plasma)  | 2.9   | 18.56992   | Endo   | 37   | [3]    | [6]             |
| Carbon  | Bird | <i>Corvus Brachyrhynchos</i>    | American crow           | 428   | Blood           | 29.8  | 190.82201  | Endo   | 37   | [1]    | [6]             |
| Carbon  | Bird | <i>Coturni japonica</i>         | Japanese quail          | 115   | Blood           | 11.2  | 71.71834   | Endo   | 37   | [3]    | [7]             |
| Carbon  | Bird | <i>Coturni japonica</i>         | Japanese quail          | 115   | Bone            | 173.3 | 1109.71324 | Endo   | 37   | [3]    | [7]             |
| Carbon  | Bird | <i>Coturni japonica</i>         | Japanese quail          | 115   | Liver           | 2.5   | 16.00855   | Endo   | 37   | [3]    | [7]             |
| Carbon  | Bird | <i>Coturni japonica</i>         | Japanese quail          | 115   | Muscle (flight) | 12.4  | 79.40244   | Endo   | 37   | [3]    | [7]             |
| Carbon  | Bird | <i>Dendroica coronata</i>       | Yellow-rumped warbler   | 12    | Blood           | 10.9  | 69.79731   | Endo   | 37   | [8]    | [9]             |
| Carbon  | Bird | <i>Dendroica coronata</i>       | Yellow-rumped warbler   | 12    | Blood (plasma)  | 1     | 6.40342    | Endo   | 37   | [8]    | [9]             |
| Carbon  | Bird | <i>Dendroica coronata</i>       | Yellow-rumped warbler   | 12.5  | Blood           | 4.5   | 28.81540   | Endo   | 37   | [1]    | [10]            |
| Carbon  | Bird | <i>Passer domesticus</i>        | House sparrow           | 22    | Blood           | 19.3  | 123.58606  | Endo   | 37   | [8]    | [11]            |
| Carbon  | Bird | <i>Passer domesticus</i>        | House sparrow           | 22    | Blood (plasma)  | 6.7   | 42.90293   | Endo   | 37   | [8]    | [11]            |
| Carbon  | Bird | <i>Passer domesticus</i>        | House sparrow           | 22    | Bone (collagen) | 20.4  | 130.62983  | Endo   | 37   | [8]    | [11]            |
| Carbon  | Bird | <i>Passer domesticus</i>        | House sparrow           | 22    | Gizzard         | 14.1  | 90.28826   | Endo   | 37   | [8]    | [11]            |
| Carbon  | Bird | <i>Passer domesticus</i>        | House sparrow           | 22    | Heart           | 15.2  | 97.33203   | Endo   | 37   | [8]    | [11]            |
| Carbon  | Bird | <i>Passer domesticus</i>        | House sparrow           | 22    | Intestine       | 10.3  | 65.95525   | Endo   | 37   | [8]    | [11]            |
| Carbon  | Bird | <i>Passer domesticus</i>        | House sparrow           | 22    | Liver           | 9.8   | 62.75354   | Endo   | 37   | [8]    | [11]            |
| Carbon  | Bird | <i>Passer domesticus</i>        | House sparrow           | 22    | Muscle (flight) | 23.5  | 150.48044  | Endo   | 37   | [8]    | [11]            |
| Carbon  | Bird | <i>Passer domesticus</i>        | House sparrow           | 23    | Blood           | 15.6  | 99.89340   | Endo   | 37   | [1]    | [1]             |
| Carbon  | Bird | <i>Sylvia borin</i>             | Garden warbler          | 24.8  | Blood           | 5.4   | 34.57848   | Endo   | 37   | [3]    | [12]            |
| Carbon  | Bird | <i>Taeniopygia guttata</i>      | Zebra finch             | 16    | Blood           | 13.4  | 85.80587   | Endo   | 37   | [8]    | [8]             |
| Carbon  | Bird | <i>Taeniopygia guttata</i>      | Zebra finch             | 16    | Brain           | 12.8  | 81.96381   | Endo   | 37   | [8]    | [8]             |
| Carbon  | Bird | <i>Taeniopygia guttata</i>      | Zebra finch             | 16    | Gizzard         | 7     | 44.82396   | Endo   | 37   | [8]    | [8]             |
| Carbon  | Bird | <i>Taeniopygia guttata</i>      | Zebra finch             | 16    | Heart           | 12    | 76.84107   | Endo   | 37   | [8]    | [8]             |
| Carbon  | Bird | <i>Taeniopygia guttata</i>      | Zebra finch             | 16    | Intestine       | 5.6   | 35.85917   | Endo   | 37   | [8]    | [8]             |
| Carbon  | Bird | <i>Taeniopygia guttata</i>      | Zebra finch             | 16    | Kidney          | 8     | 51.22738   | Endo   | 37   | [8]    | [8]             |
| Carbon  | Bird | <i>Taeniopygia guttata</i>      | Zebra finch             | 16    | Liver           | 8.3   | 53.14841   | Endo   | 37   | [8]    | [8]             |
| Carbon  | Bird | <i>Taeniopygia guttata</i>      | Zebra finch             | 16    | Muscle (flight) | 14.5  | 92.84963   | Endo   | 37   | [8]    | [8]             |
| Carbon  | Bird | <i>Taeniopygia guttata</i>      | Zebra finch             | 16    | Muscle (leg)    | 18.1  | 115.90196  | Endo   | 37   | [8]    | [8]             |
| Carbon  | Fish | <i>Danio rerio</i>              | Zebra danio             | 0.28  | Muscle          | 53.3  | 171.99465  | Ecto   | 28.5 | [13]   | [14]            |
| Carbon  | Fish | <i>Dicentrarchus labrax</i>     | European sea bass       | 8     | Muscle          | 157.5 | 119.58432  | Ecto   | 12   | [13]   | [15]            |
| Carbon  | Fish | <i>Lateolabrax japonicus</i>    | Japanese temperate bass | 9.87  | Muscle          | 21    | 42.59146   | Ecto   | 23   | [13]   | [16]            |

| Element | Taxa   | Species                            | Common name       | Mass     | Tissue type    | HL   | HL15°C    | Thermy | Temp  | Source | Original source |
|---------|--------|------------------------------------|-------------------|----------|----------------|------|-----------|--------|-------|--------|-----------------|
| Carbon  | Fish   | <i>Lepomis macrochirus</i>         | Bluegill          | 0.06     | Muscle         | 18   | 32.06743  | Ecto   | 21.5  | [13]   | [13]            |
| Carbon  | Fish   | <i>Lepomis macrochirus</i>         | Bluegill          | 5.38     | Muscle         | 29   | 51.66419  | Ecto   | 21.5  | [13]   | [13]            |
| Carbon  | Fish   | <i>Lepomis macrochirus</i>         | Bluegill          | 72.7     | Muscle         | 116  | 206.65678 | Ecto   | 21.5  | [13]   | [13]            |
| Carbon  | Fish   | <i>Micropterus salmoides</i>       | Largemouth bass   | 0.52     | Muscle         | 18   | 32.06743  | Ecto   | 21.5  | [13]   | [13]            |
| Carbon  | Fish   | <i>Micropterus salmoides</i>       | Largemouth bass   | 5.6      | Muscle         | 25   | 44.53809  | Ecto   | 21.5  | [13]   | [13]            |
| Carbon  | Fish   | <i>Micropterus salmoides</i>       | Largemouth bass   | 413      | Muscle         | 173  | 308.20364 | Ecto   | 21.5  | [13]   | [13]            |
| Carbon  | Fish   | <i>Oreochromis niloticus</i>       | Nile tilapia      | 23.87    | Muscle         | 23.3 | 56.06088  | Ecto   | 25    | [13]   | [17]            |
| Carbon  | Fish   | <i>Oreochromis niloticus</i>       | Nile tilapia      | 24.46    | Muscle         | 26   | 62.55720  | Ecto   | 25    | [13]   | [17]            |
| Carbon  | Fish   | <i>Paralichthys dentatus</i>       | Summer flounder   | 0.00067* | Whole organism | 8.7  | 7.24536   | Ecto   | 13    | [13]   | [18]            |
| Carbon  | Fish   | <i>Paralichthys dentatus</i>       | Summer flounder   | 0.00067* | Whole organism | 2.9  | 5.39540   | Ecto   | 22    | [13]   | [18]            |
| Carbon  | Fish   | <i>Paralichthys dentatus</i>       | Summer flounder   | 0.00718* | Whole organism | 11.6 | 9.66048   | Ecto   | 13    | [13]   | [18]            |
| Carbon  | Fish   | <i>Paralichthys dentatus</i>       | Summer flounder   | 0.00718* | Whole organism | 5    | 9.30241   | Ecto   | 22    | [13]   | [18]            |
| Carbon  | Fish   | <i>Paralichthys dentatus</i>       | Summer flounder   | 0.02080* | Whole organism | 17.3 | 14.40745  | Ecto   | 13    | [13]   | [18]            |
| Carbon  | Fish   | <i>Paralichthys dentatus</i>       | Summer flounder   | 0.02080* | Whole organism | 5.8  | 10.79080  | Ecto   | 22    | [13]   | [18]            |
| Carbon  | Fish   | <i>Paralichthys dentatus</i>       | Summer flounder   | 58.8     | Muscle         | 69   | 106.89063 | Ecto   | 19.9  | [13]   | [19]            |
| Carbon  | Fish   | <i>Paralichthys dentatus</i>       | Summer flounder   | 102      | Muscle         | 49   | 79.30979  | Ecto   | 20.4  | [13]   | [19]            |
| Carbon  | Fish   | <i>Paralichthys olivaceus</i>      | Japanese flounder | 0.26     | Muscle         | 17.3 | 22.96049  | Ecto   | 18.15 | [13]   | [20]            |
| Carbon  | Fish   | <i>Paralichthys olivaceus</i>      | Japanese flounder | 0.26     | Muscle         | 13.9 | 16.64862  | Ecto   | 17    | [13]   | [20]            |
| Carbon  | Fish   | <i>Paralichthys olivaceus</i>      | Japanese flounder | 1.06     | Muscle         | 5    | 6.84543   | Ecto   | 18.5  | [13]   | [20]            |
| Carbon  | Fish   | <i>Perca flavescens</i>            | Yellow perch      | 0.11     | Muscle         | 8    | 14.25219  | Ecto   | 21.5  | [13]   | [13]            |
| Carbon  | Fish   | <i>Perca flavescens</i>            | Yellow perch      | 2.24     | Muscle         | 58   | 103.32839 | Ecto   | 21.5  | [13]   | [13]            |
| Carbon  | Fish   | <i>Perca flavescens</i>            | Yellow perch      | 11.16    | Muscle         | 116  | 206.65678 | Ecto   | 21.5  | [13]   | [13]            |
| Carbon  | Fish   | <i>Pleuronectes americanus</i>     | Winter flounder   | 0.00255* | Whole organism | 2.2  | 2.88113   | Ecto   | 18    | [13]   | [21]            |
| Carbon  | Fish   | <i>Pleuronectes americanus</i>     | Winter flounder   | 0.00322* | Whole organism | 4.1  | 3.41448   | Ecto   | 13    | [13]   | [21]            |
| Carbon  | Fish   | <i>Pomatoschistus minutus</i>      | Sand goby         | 5.85     | Muscle         | 23.9 | 28.62604  | Ecto   | 17    | [13]   | [22]            |
| Carbon  | Fish   | <i>Pseudoplatystoma corruscans</i> | Pintado           | 0.77     | Whole organism | 105  | 291.35423 | Ecto   | 26.69 | [13]   | [23]            |
| Carbon  | Fish   | <i>Sciaenops ocellatus</i>         | Red drum          | 0.00016* | Whole organism | 6    | 18.57412  | Ecto   | 28    | [13]   | [24,25]         |
| Carbon  | Fish   | <i>Sciaenops ocellatus</i>         | Red drum          | 0.00496* | Whole organism | 5    | 15.47844  | Ecto   | 28    | [13]   | [24,25]         |
| Carbon  | Fish   | <i>Sciaenops ocellatus</i>         | Red drum          | 0.00597* | Whole organism | 7    | 15.46772  | Ecto   | 24    | [13]   | [24,25]         |
| Carbon  | Fish   | <i>Solea senegalensis</i>          | Senegalese sole   | 0.00176* | Whole organism | 2.5  | 4.45380   | Ecto   | 21.5  | [13]   | [26]            |
| Carbon  | Fish   | <i>Solea senegalensis</i>          | Senegalese sole   | 0.00176* | Whole organism | 2.7  | 4.81011   | Ecto   | 21.5  | [13]   | [26]            |
| Carbon  | Fish   | <i>Solea senegalensis</i>          | Senegalese sole   | 0.00176* | Whole organism | 3.5  | 6.23533   | Ecto   | 21.5  | [13]   | [26]            |
| Carbon  | Mammal | <i>Equus caballus</i>              | Horse             | 409778   | Hair           | 136  | 870.86556 | Endo   | 37    | [3]    | [27]            |
| Carbon  | Mammal | <i>Meriones unguiculatus</i>       | Gerbil            | 64.8     | Brain          | 27.7 | 177.37482 | Endo   | 37    | [3]    | [28]            |
| Carbon  | Mammal | <i>Meriones unguiculatus</i>       | Gerbil            | 64.8     | Fat            | 15.8 | 101.17408 | Endo   | 37    | [3]    | [28]            |
| Carbon  | Mammal | <i>Meriones unguiculatus</i>       | Gerbil            | 64.8     | Hair           | 46.2 | 295.83815 | Endo   | 37    | [3]    | [28]            |
| Carbon  | Mammal | <i>Meriones unguiculatus</i>       | Gerbil            | 64.8     | Liver          | 6.4  | 40.98190  | Endo   | 37    | [3]    | [28]            |
| Carbon  | Mammal | <i>Meriones unguiculatus</i>       | Gerbil            | 64.8     | Muscle         | 27.7 | 177.37482 | Endo   | 37    | [3]    | [28]            |
| Carbon  | Mammal | <i>Mus musculus</i>                | Mouse             | 18.55    | Blood          | 16.9 | 108.21785 | Endo   | 37    | [3]    | [29]            |
| Carbon  | Mammal | <i>Mus musculus</i>                | Mouse             | 18.55    | Muscle         | 23.9 | 153.04181 | Endo   | 37    | [3]    | [29]            |
| Carbon  | Mammal | <i>Mus musculus</i>                | Mouse (28 d)      | 19       | Blood          | 20.4 | 130.62983 | Endo   | 37    | [8]    | [30]            |
| Carbon  | Mammal | <i>Mus musculus</i>                | Mouse (172 d)     | 19       | Blood          | 19.8 | 126.78778 | Endo   | 37    | [8]    | [30]            |
| Carbon  | Mammal | <i>Mus musculus</i>                | Mouse (28 d)      | 19       | Brain          | 17.8 | 113.98093 | Endo   | 37    | [8]    | [30]            |
| Carbon  | Mammal | <i>Mus musculus</i>                | Mouse (28 d)      | 19       | Heart          | 13.9 | 89.00758  | Endo   | 37    | [8]    | [30]            |
| Carbon  | Mammal | <i>Mus musculus</i>                | Mouse (28 d)      | 19       | Kidney         | 4.6  | 29.45574  | Endo   | 37    | [8]    | [30]            |
| Carbon  | Mammal | <i>Mus musculus</i>                | Mouse (28 d)      | 19       | Liver          | 5    | 32.01711  | Endo   | 37    | [8]    | [30]            |
| Carbon  | Mammal | <i>Mus musculus</i>                | Mouse (172 d)     | 19       | Liver          | 7.7  | 49.30635  | Endo   | 37    | [8]    | [30]            |

| Element  | Taxa       | Species                         | Common name           | Mass     | Tissue type    | HL    | HL15°C     | Thermy | Temp | Source | Original source |
|----------|------------|---------------------------------|-----------------------|----------|----------------|-------|------------|--------|------|--------|-----------------|
| Carbon   | Mammal     | <i>Mus musculus</i>             | Mouse (28 d)          | 19       | Muscle (leg)   | 23.1  | 147.91907  | Endo   | 37   | [8]    | [30]            |
| Carbon   | Mammal     | <i>Mus musculus</i>             | Mouse (172 d)         | 19       | Muscle (leg)   | 18.2  | 116.54230  | Endo   | 37   | [8]    | [30]            |
| Carbon   | Mammal     | <i>Mus musculus</i>             | Mouse                 | 27.7     | Blood          | 18.6  | 119.10367  | Endo   | 37   | [3]    | [3]             |
| Carbon   | Mammal     | <i>Rattus norvegicus</i>        | Rat                   | 288      | Blood          | 24.7  | 158.16455  | Endo   | 37   | [3]    | [3]             |
| Carbon   | Mammal     | <i>Vicugna pacos</i>            | Alpaca                | 60000    | Liver          | 37.3  | 238.84768  | Endo   | 37   | [8]    | [31]            |
| Carbon   | Mammal     | <i>Vicugna pacos</i>            | Alpaca                | 60000    | Muscle (leg)   | 178.7 | 1144.29173 | Endo   | 37   | [8]    | [31]            |
| Carbon   | Shark      | <i>Carcharhinus plumbeus</i>    | Sandbar shark         | 5500     | Blood          | 93.25 | 197.42225  | Ecto   | 23.5 | [32]   | [32]            |
| Carbon   | Shark      | <i>Carcharhinus plumbeus</i>    | Sandbar shark         | 5500     | Muscle         | 155.2 | 328.57837  | Ecto   | 23.5 | [32]   | [32]            |
| Nitrogen | Amphibian  | <i>Rana palmipes</i>            | Tadpole               | 2.115    | Muscle         | 138.6 | 293.43403  | Ecto   | 23.5 | [33]   | [33]            |
| Nitrogen | Bird       | <i>Aythya valisineria</i>       | Canvasback            | 1250     | Blood          | 23.2  | 148.55941  | Endo   | 37   | [3]    | [2]             |
| Nitrogen | Bird       | <i>Calidris alpina pacifica</i> | Dunlin                | 44       | Blood          | 10    | 64.03423   | Endo   | 37   | [3]    | [4]             |
| Nitrogen | Bird       | <i>Catharacta skua</i>          | Great skua            | 970      | Blood          | 12    | 76.84107   | Endo   | 37   | [3]    | [5]             |
| Nitrogen | Bird       | <i>Dendroica coronata</i>       | Yellow-rumped warbler | 11.5     | Blood          | 7.5   | 48.02567   | Endo   | 37   | [3]    | [10]            |
| Nitrogen | Bird       | <i>Sylvia borin</i>             | Garden warbler        | 24.8     | Blood          | 8.1   | 51.86772   | Endo   | 37   | [3]    | [12]            |
| Nitrogen | Crustacean | <i>Euphausiacea</i> spp.        | Krill                 | 0.01     | Whole organism | 784   | 159.87826  | Ecto   | -1.5 | [33]   | [34]            |
| Nitrogen | Crustacean | <i>Euphausiacea</i> spp.        | Krill                 | 0.01     | Whole organism | 156   | 43.08434   | Ecto   | 1.5  | [33]   | [34]            |
| Nitrogen | Fish       | <i>Ancistrus triradiatus</i>    | Armored catfish       | 1.44     | Blood          | 16.9  | 35.77947   | Ecto   | 23.5 | [33]   | [33]            |
| Nitrogen | Fish       | <i>Ancistrus triradiatus</i>    | Armored catfish       | 1.44     | Muscle         | 18.2  | 38.53174   | Ecto   | 23.5 | [33]   | [33]            |
| Nitrogen | Fish       | <i>Ancistrus triradiatus</i>    | Armored catfish       | 1.44     | Muscle (fin)   | 12.2  | 25.82897   | Ecto   | 23.5 | [33]   | [33]            |
| Nitrogen | Fish       | <i>Paralichthys dentatus</i>    | Summer flounder       | 0.01     | Whole organism | 8     | 6.66240    | Ecto   | 13   | [33]   | [18]            |
| Nitrogen | Fish       | <i>Paralichthys dentatus</i>    | Summer flounder       | 0.01     | Whole organism | 3     | 5.58145    | Ecto   | 22   | [33]   | [18]            |
| Nitrogen | Fish       | <i>Paralichthys dentatus</i>    | Summer flounder       | 0.1      | Whole organism | 14    | 11.65921   | Ecto   | 13   | [33]   | [18]            |
| Nitrogen | Fish       | <i>Paralichthys dentatus</i>    | Summer flounder       | 0.1      | Whole organism | 6     | 11.16290   | Ecto   | 22   | [33]   | [18]            |
| Nitrogen | Fish       | <i>Pleuronectes americanus</i>  | Winter flounder       | 0.00255* | Whole organism | 3.1   | 4.05978    | Ecto   | 18   | [21]   | [21]            |
| Nitrogen | Fish       | <i>Pleuronectes americanus</i>  | Winter flounder       | 0.00322* | Whole organism | 3.9   | 3.24792    | Ecto   | 13   | [21]   | [21]            |
| Nitrogen | Fish       | <i>Salvelinus namaycush</i>     | Lake trout            | 55       | Whole organism | 69    | 45.97915   | Ecto   | 10.6 | [33]   | [35]            |
| Nitrogen | Gastropod  | <i>Elimia</i> sp.               | Snail                 | 0.1      | Whole organism | 69    | 54.36701   | Ecto   | 12.4 | [33]   | [36]            |
| Nitrogen | Gastropod  | <i>Lavigeria grandis</i>        | Snail                 | 0.495    | Muscle         | 49.5  | 129.60970  | Ecto   | 26   | [33]   | [33]            |
| Nitrogen | Gastropod  | <i>Tarebia granifera</i>        | Snail                 | 0.055    | Muscle         | 20.2  | 42.76599   | Ecto   | 23.5 | [33]   | [33]            |
| Nitrogen | Mammal     | <i>Mus musculus</i>             | Mouse                 | 18.55    | Blood          | 19.3  | 123.58606  | Endo   | 37   | [3]    | [29]            |
| Nitrogen | Mammal     | <i>Mus musculus</i>             | Mouse                 | 18.55    | Liver          | 7.3   | 46.74498   | Endo   | 37   | [3]    | [29]            |
| Nitrogen | Mammal     | <i>Mus musculus</i>             | Mouse                 | 18.55    | Muscle         | 24.8  | 158.80489  | Endo   | 37   | [3]    | [29]            |
| Nitrogen | Mammal     | <i>Mus musculus</i>             | Mouse                 | 27.7     | Blood          | 19.6  | 125.50709  | Endo   | 37   | [3]    | [3]             |
| Nitrogen | Mammal     | <i>Rattus norvegicus</i>        | Rat                   | 288      | Blood          | 21.3  | 136.39291  | Endo   | 37   | [3]    | [3]             |
| Nitrogen | Shark      | <i>Carcharhinus plumbeus</i>    | Sandbar shark         | 5500     | Blood          | 60.6  | 128.29799  | Ecto   | 23.5 | [32]   | [32]            |
| Nitrogen | Shark      | <i>Carcharhinus plumbeus</i>    | Sandbar shark         | 5500     | Muscle         | 92.35 | 195.51683  | Ecto   | 23.5 | [32]   | [32]            |

\* Dry mass converted to wet mass using data for Chinook salmon (*Oncorhynchus tshawytscha*) – dry mass is 14.9% of wet mass [37].

**Table S3.** Data sources for carbon and nitrogen half-life within individual organisms (see Table S2).

1. Carleton SA, Martinez del Rio C (2005) The effect of cold-induced increased metabolic rate on the rate of  $^{13}\text{C}$  and  $^{15}\text{N}$  incorporation in house sparrows (*Passer domesticus*). *Oecologia* 144: 226-232.
2. Haramis GM, Jorde DG, Macko SA, Walker JL (2001) Stable-isotope analysis of Canvasback winter diet in upper Chesapeake Bay. *Auk* 118: 1008-1017.
3. MacAvoy SE, Arneson LS, Bassett E (2006) Correlation of metabolism with tissue carbon and nitrogen turnover rate in small mammals. *Oecologia* 150: 190-201.
4. Ogden LJE, Hobson KA, Lank DB (2004) Blood Isotopic ( $\delta^{13}\text{C}$  and  $\delta^{15}\text{N}$ ) Turnover and Diet-Tissue Fractionation Factors in Captive Dunlin (*Calidris Alpina Pacifica*). *The Auk* 121: 170.
5. Bearhop S, Waldron S, Votier S, Furness R (2002) Factors that influence assimilation rates and fractionation of nitrogen and carbon stable isotopes in avian blood and feathers. *Physiol Biochem Zool* 75: 451-458.
6. Hobson K, Clarke R (1993) Turnover of  $^{13}\text{C}$  in cellular and plasma fractions of blood: implications for nondestructive sampling in avian dietary studies. *Auk* 110: 638-641.
7. Hobson K, Clark R (1992) Assessing avian diets using stable isotopes I: turnover of  $^{13}\text{C}$  in tissues. *Condor* 94: 181-188.
8. Bauchinger U, McWilliams S (2009) Carbon turnover in tissues of a passerine bird: allometry, isotopic clocks, and phenotypic flexibility in organ size. *Physiol Biochem Zool* 82: 787-797.
9. Podlesak DW, McWilliams SR, Hatch KA (2005) Stable isotopes in breath, blood, feces and feathers can indicate intra-individual changes in the diet of migratory songbirds. *Oecologia* 142: 501-510.
10. Pearson SF, Levey DJ, Greenberg CH, Martinez Del Rio C (2003) Effects of elemental composition on the incorporation of dietary nitrogen and carbon isotopic signatures in an omnivorous songbird. *Oecologia* 135: 516-523.
11. Carleton SA, Kelly L, Anderson-Sprecher R, del Rio CM (2008) Should we use one-, or multi-compartment models to describe ( $^{13}\text{C}$ ) incorporation into animal tissues? *Rapid Commun Mass Spectrom* 22: 3008-3014.
12. Hobson KA, Bairlein F (2003) Isotopic fractionation and turnover in captive Garden Warblers (*Sylvia borin*): implications for delineating dietary and migratory associations in wild passerines. *Canadian Journal of Zoology-Revue Canadienne De Zoologie* 81: 1630-1635.
13. Trudel M, Weidel BC, Carpenter SR, Kitchell JF, Vander Zanden MJ (2011) Rates and components of carbon turnover in fish muscle: insights from bioenergetics models and a whole-lake  $^{13}\text{C}$  addition. *Canadian Journal of Fisheries and Aquatic Sciences* 68: 387-399.
14. Tarboush RA, MacAvoy SE, Macko SA, Connaughton V (2006) Contribution of catabolic tissue replacement to the turnover of stable isotopes in *Danio rerio*. *Canadian Journal of Zoology* 84: 1453-1460.
15. Sweeting CJ, Jennings S, Polunin NVC (2005) Variance in isotopic signatures as a descriptor of tissue turnover and degree of omnivory. *Functional Ecology* 19: 777-784.
16. Suzuki KW, Kasai A, Nakayama K, Tanaka M (2005) Differential isotopic enrichment and half-life among tissues in Japanese temperate bass (*Lateolabrax japonicus*) juveniles: implications for analyzing migration. *Canadian Journal of Fisheries and Aquatic Sciences* 62: 671-678.
17. Zuanon JA, Pezzato AC, Pezzato LE, Passos JR, Barros MM, et al. (2006) Muscle  $\delta^{13}\text{C}$  change in Nile tilapia (*Oreochromis niloticus*): effects of growth and carbon turnover. *Comp Biochem Physiol B Biochem Mol Biol* 145: 101-107.
18. Witting DA, Chambers RC, Bosley KL, Wainright SC (2004) Experimental evaluation of ontogenetic diet transitions in summer flounder (*Paralichthys dentatus*), using stable isotopes as diet tracers. *Canadian Journal of Fisheries and Aquatic Sciences* 61: 2069-2084.
19. Buchheister A, RJ L (2010) Turnover and fractionation of carbon and nitrogen stable isotopes in tissues of a migratory coastal predator, summer flounder (*Paralichthys dentatus*). *Can J Fish Aquat Sci* 67: 445-461.
20. Tominaga O, Uno N, Seikai T (2003) Influence of diet shift from formulated feed to live mysids on the carbon and nitrogen stable isotope ratio ( $\delta^{13}\text{C}$  and  $\delta^{15}\text{N}$ ) in dorsal muscles of juvenile Japanese flounders, *Paralichthys olivaceus*. *Aquaculture* 218: 265-276.
21. Bosley KL, Witting DA, Chambers RC, Wainright SC (2002) Estimating turnover rates of carbon and nitrogen in recently metamorphosed winter flounder *Pseudopleuronectes americanus* with stable isotopes. *Marine Ecology Progress Series* 236: 233-240.



22. Guelinckx J, Maes J, Van Den Driessche P, Geysen B, Dehairs F, et al. (2007) Changes in  $\delta^{13}\text{C}$  and  $\delta^{15}\text{N}$  in different tissues of juvenile sand goby *Pomatoschistus minutus*: a laboratory diet-switch experiment. *Marine Ecology Progress Series* 341: 205-215.
23. Furuya VRB, Hayashi C, Furuya WM, Sakaguti ES (2002) Replacement rates of carbon stable isotope ( $^{13}\text{C}$ ) in muscle tissue of pintado, *Pseudoplatystoma corruscans* (Agassiz, 1829) *Zootecnia Trop.* 20(4):461-472..
24. Herzka SZ, Holt GJ (2000) Changes in isotopic composition of red drum (*Sciaenops ocellatus*) larvae in response to dietary shifts: potential applications to settlement studies. *Canadian Journal of Fisheries and Aquatic Sciences* 57: 137-147.
25. Herzka SZ (2005) Assessing connectivity of estuarine fishes based on stable isotope ratio analysis. *Estuarine Coastal and Shelf Science* 64: 58-69.
26. Gamboa-Delgado J, Cañavate JP, Zerolo R, Le Vay L (2008) Natural carbon stable isotope ratios as indicators of the relative contribution of live and inert diets to growth in larval Senegalese sole (*Solea senegalensis*). *Aquaculture* 280: 190-197.
27. Ayliffe LK, Cerling TE, Robinson T, West AG, Sponheimer M, et al. (2004) Turnover of carbon isotopes in tail hair and breath  $\text{CO}_2$  of horses fed an isotopically varied diet. *Oecologia* 139: 11-22.
28. Tieszen LL, Boutton TW, Tesdahl KG, Slade NA (1983) Fractionation and turnover of stable carbon isotopes in animal tissues: Implications for  $^{13}\text{C}$  analysis of diet. *Oecologia* 57: 32-37.
29. MacAvoy SE, Macko SA, Arneson LS (2005) Growth versus metabolic tissue replacement in mouse tissues determined by stable carbon and nitrogen isotope analysis. *Canadian Journal of Zoology* 83: 631-641.
30. Arneson LS, MacAvoy S, Basset E (2006) Metabolic protein replacement drives tissue turnover in adult mice. *Canadian Journal of Zoology-Revue Canadienne De Zoologie* 84: 992-1002.
31. Sponheimer M, Robinson TF, Cerling TE, Tegland L, Roeder BL, et al. (2006) Turnover of stable carbon isotopes in the muscle, liver, and breath  $\text{CO}_2$  of alpacas (*Lama pacos*). *Rapid Commun Mass Spectrom* 20: 1395-1399.
32. Logan JM, Lutcavage ME (2010) Stable isotope dynamics in elasmobranch fishes. *Hydrobiologia* 644: 231-244.
33. McIntyre PB, Flecker AS (2006) Rapid turnover of tissue nitrogen of primary consumers in tropical freshwaters. *Oecologia* 148: 12-21.
34. Frazer TK, Ross RM, Quetin LB, Montoya JP (1997) Turnover of carbon and nitrogen during growth of larval krill, *Euphausia superba* Dana: a stable isotope approach. *J Exp Mar Biol Ecol* 212(2):259-275.
35. Harvey CJ, Hanson PC, Essington TE, Brown PB, Kitchell JF (2002) Using bioenergetics models to predict stable isotope ratios in fishes. *Canadian Journal of Fisheries and Aquatic Sciences* 59: 115-124.
36. Mulholland PJ, Tank JL, Sanzone DM (2000) Nitrogen cycling in a forest stream determined by a  $^{15}\text{N}$  tracer addition. *Ecological Monographs* 70: 471-493.
37. Rombough P (1994) Energy partitioning during fish development: additive or compensatory allocation of energy to support growth? *Functional Ecology* 8: 178-186.

**Figure S1.** The 37 ecological steady-state (inputs equal outputs) carbon flow models we constructed for numerical evaluation. In each trophic compartment (red box) is shown the ecological functional group (e.g., trees, insects, top carnivore) and total compartment biomass  $X_i$  ( $\text{kg C/m}^2$ ). Black arrows in and out of compartments represent carbon flows in and out, respectively. The incoming flow on the left of the system ( $f_{01}$ ) is GPP ( $\text{kg C/yr m}^2$ ) and all outgoing flows  $f_{i0}$  represent respiration ( $\text{kg C/yr m}^2$ ). Dotted line represents the system boundary. See Table S1 for summary data for each model, and Materials and Methods for details of model calculations.

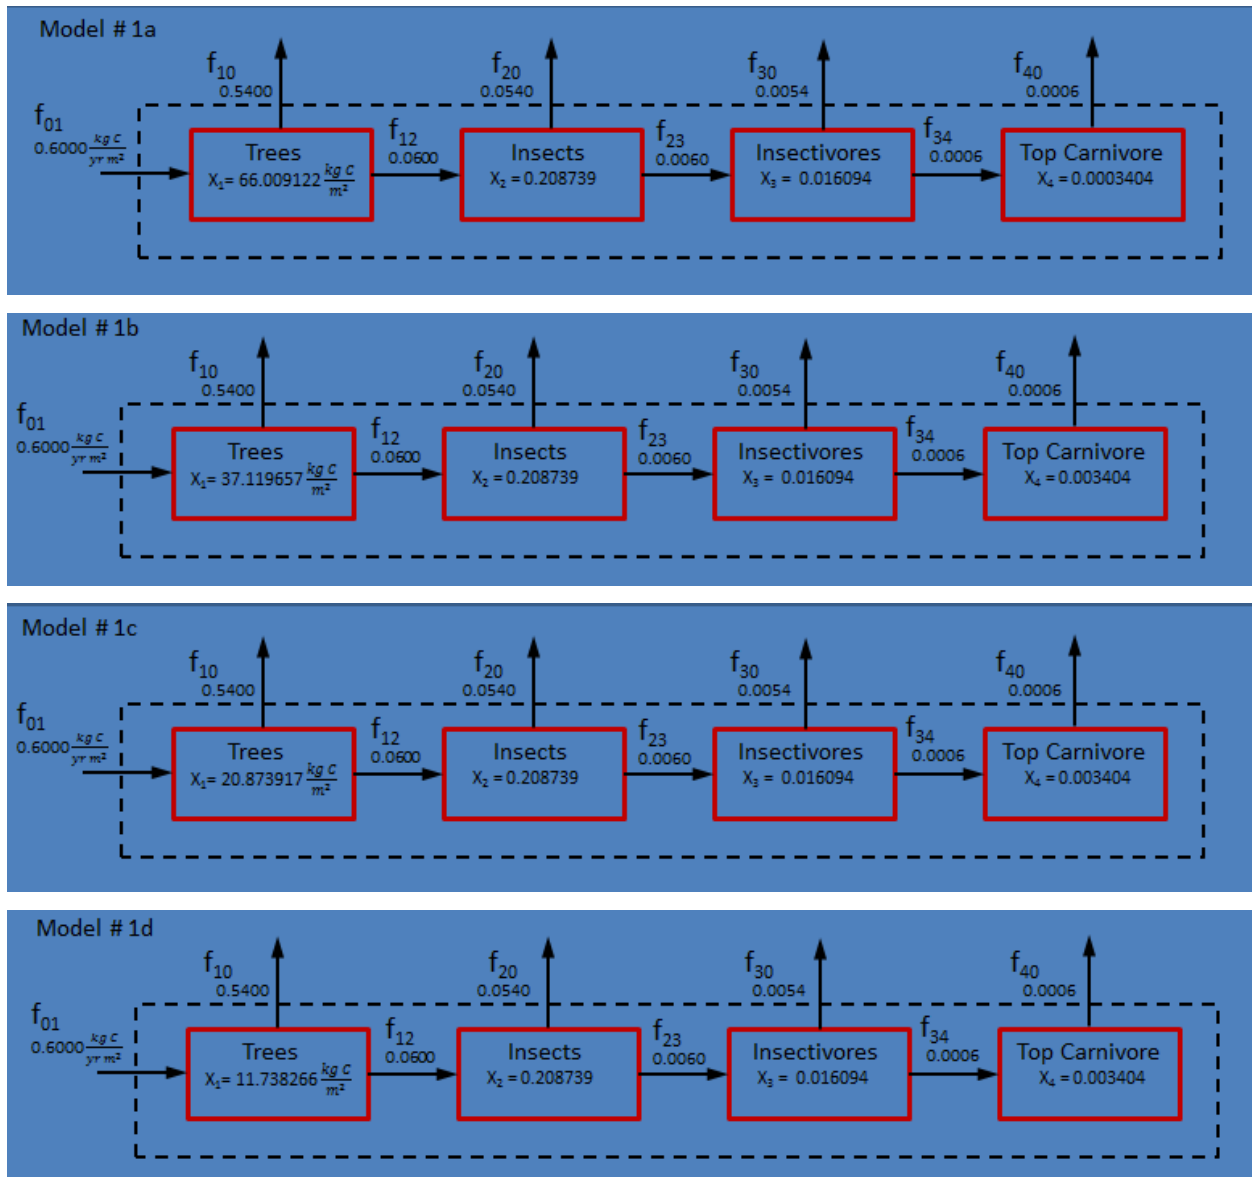

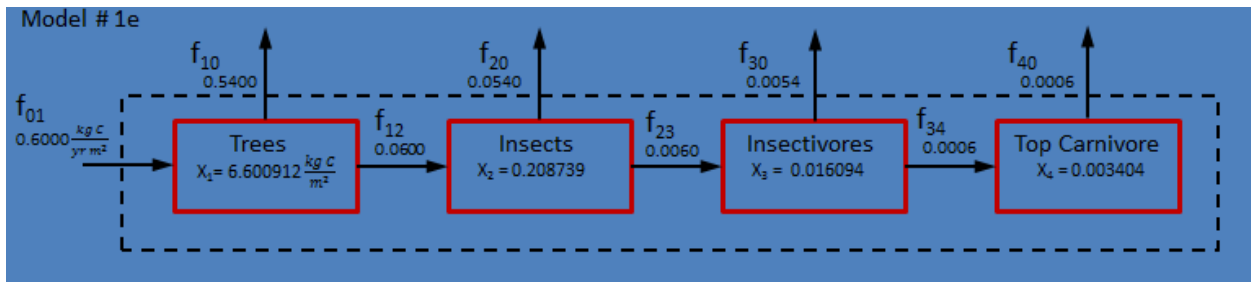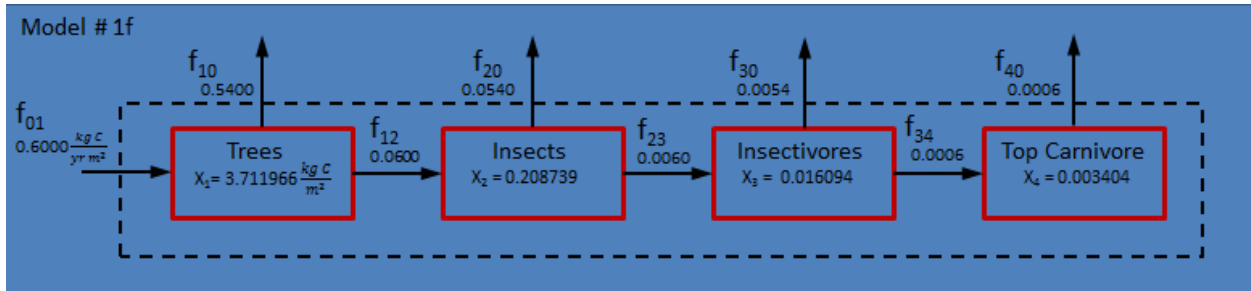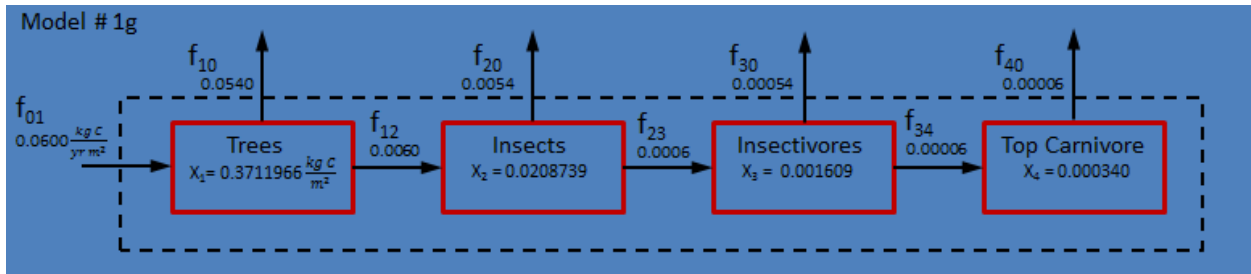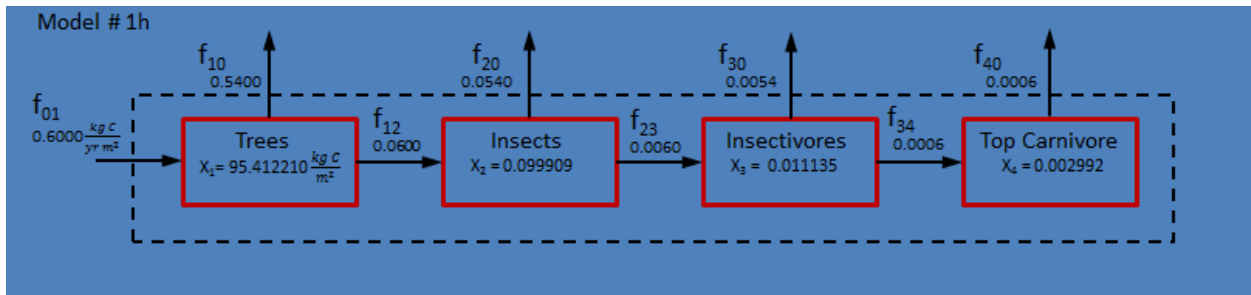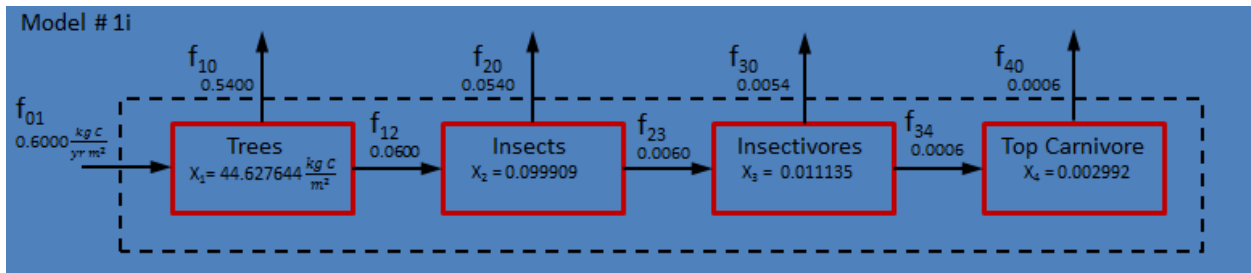

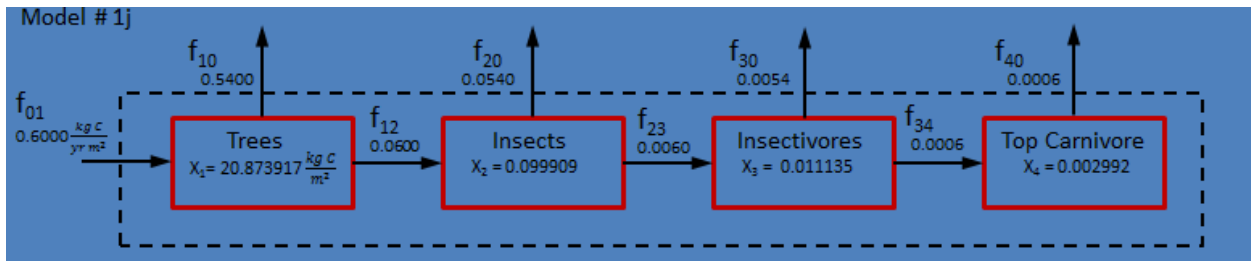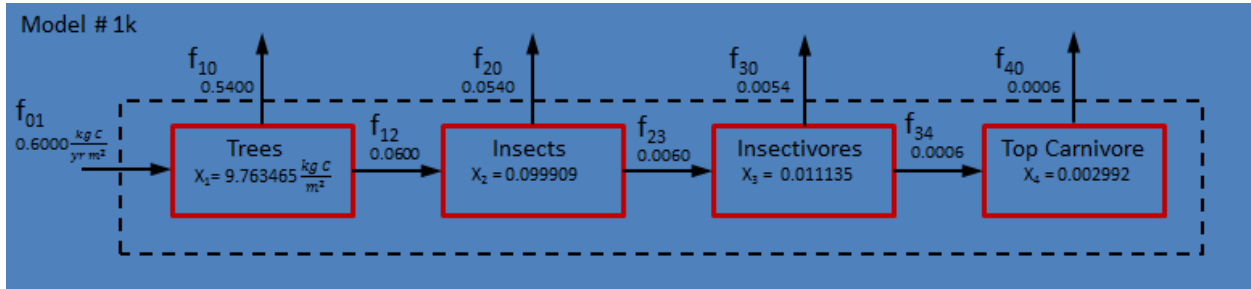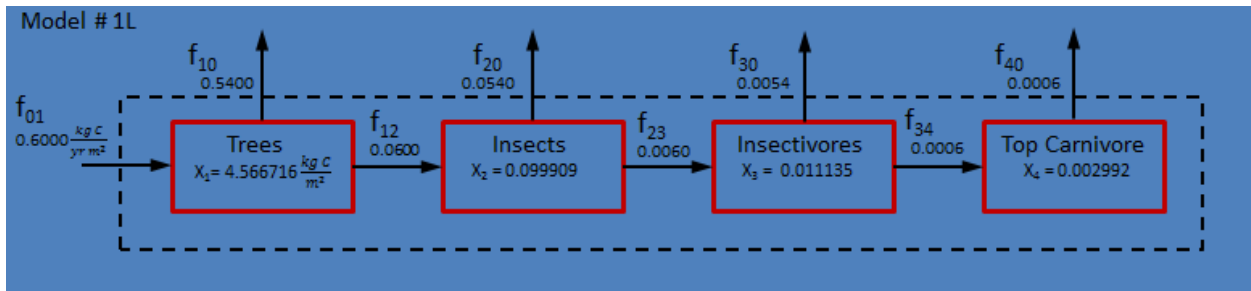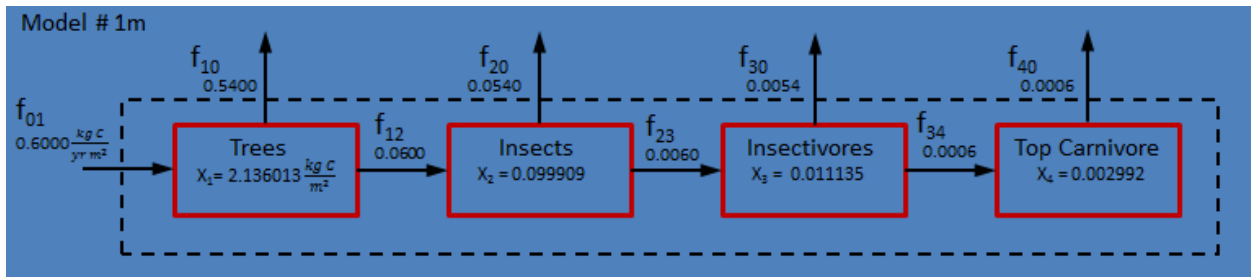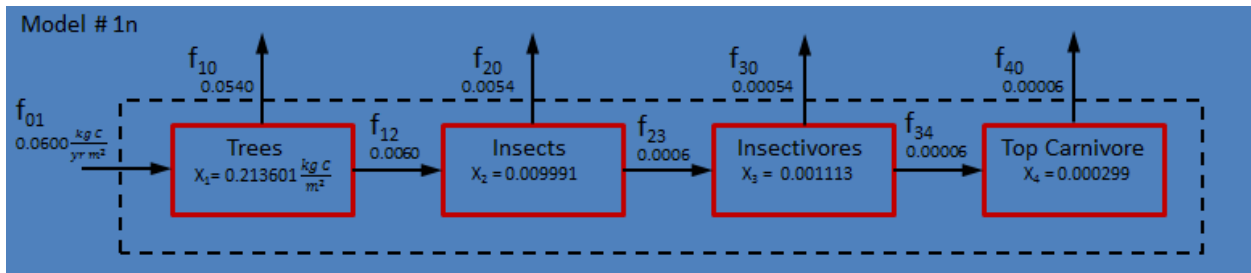

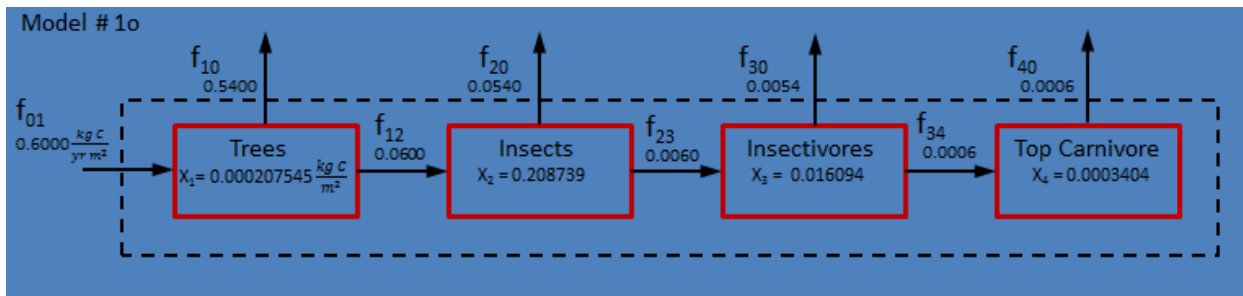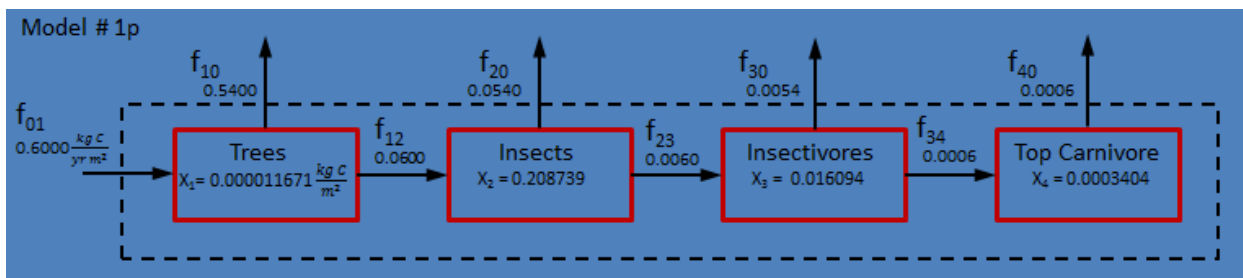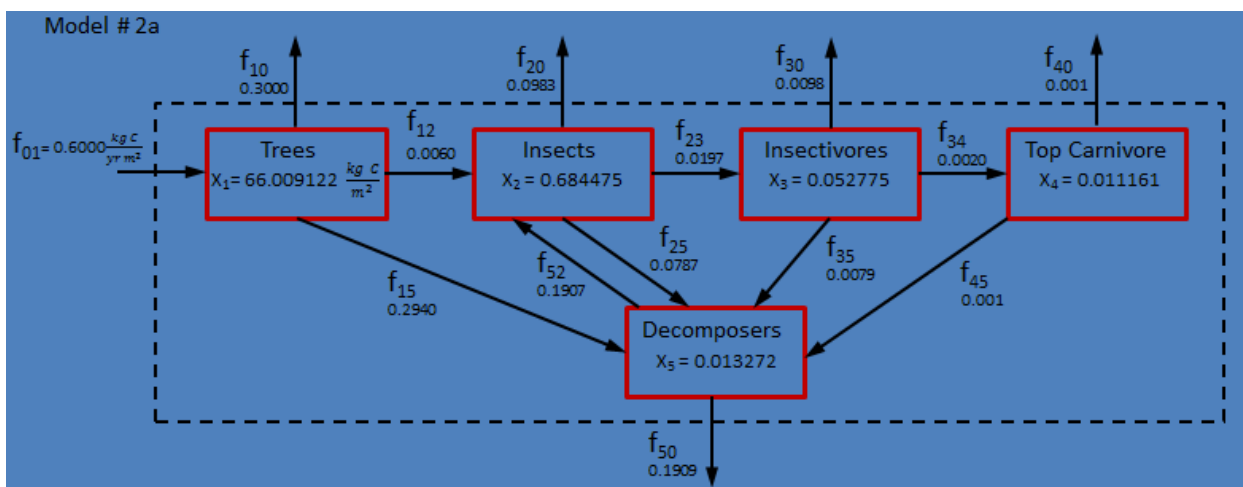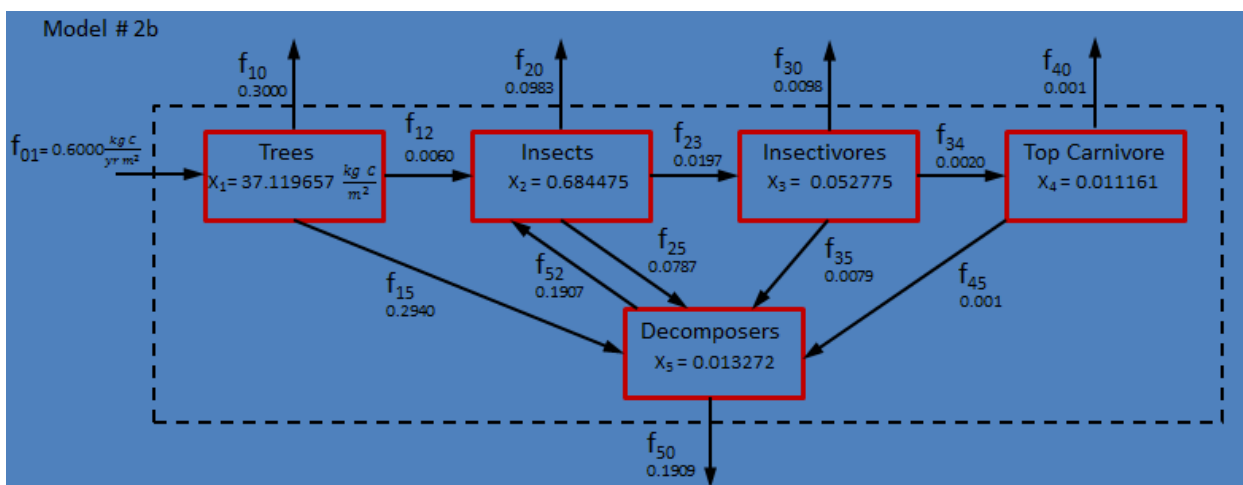

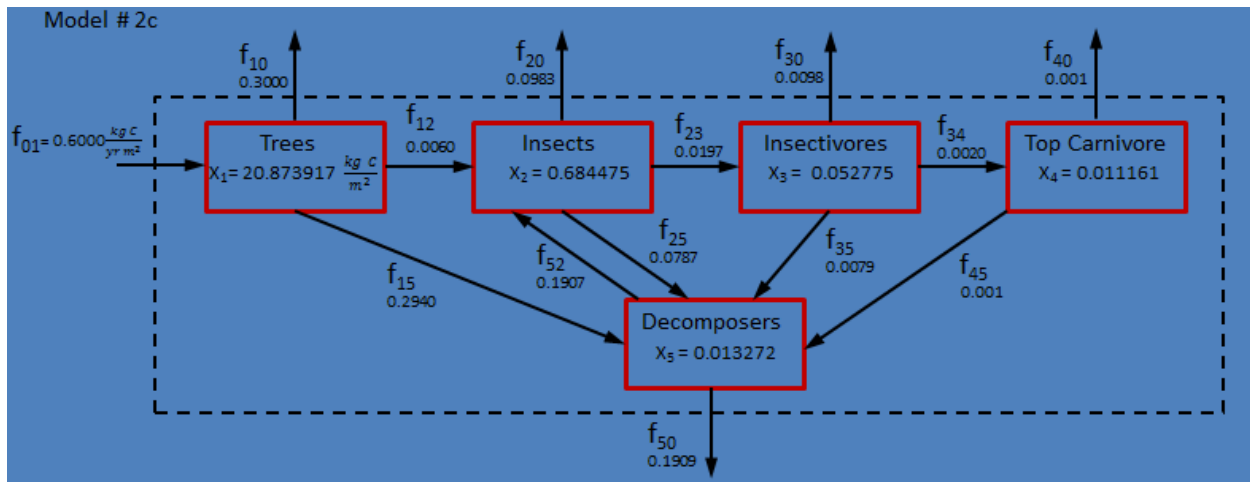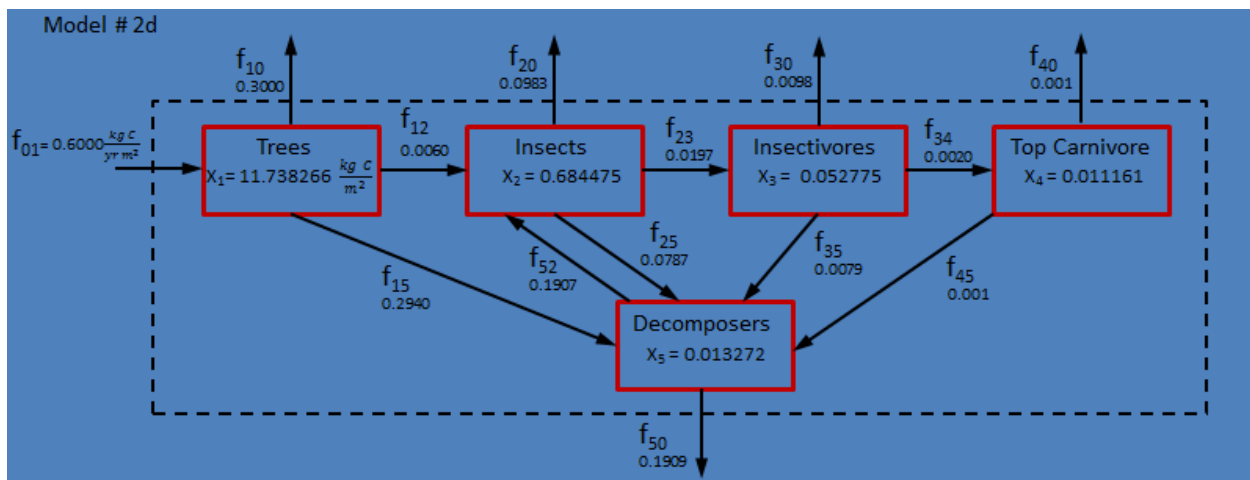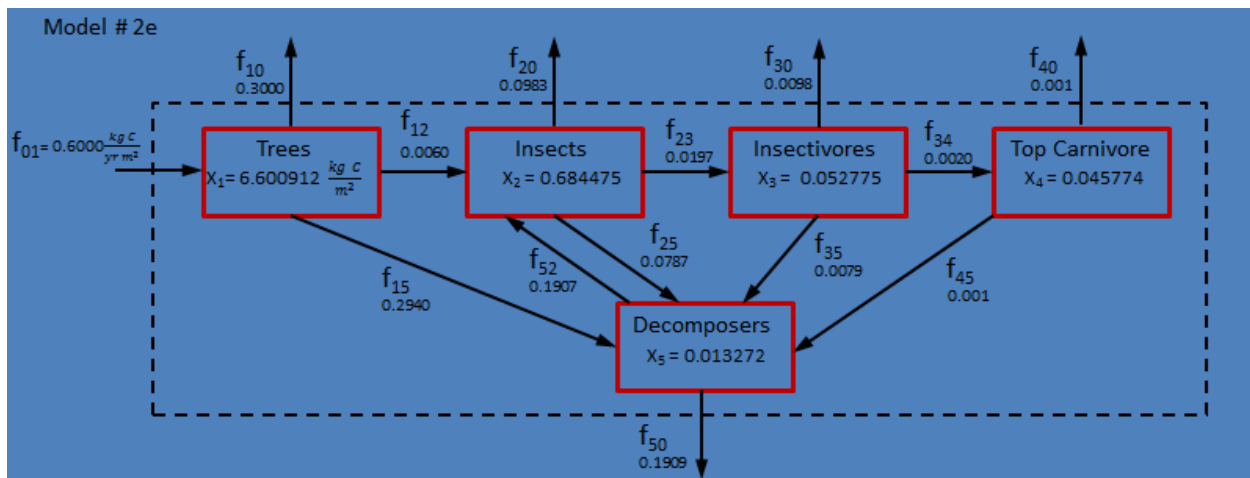

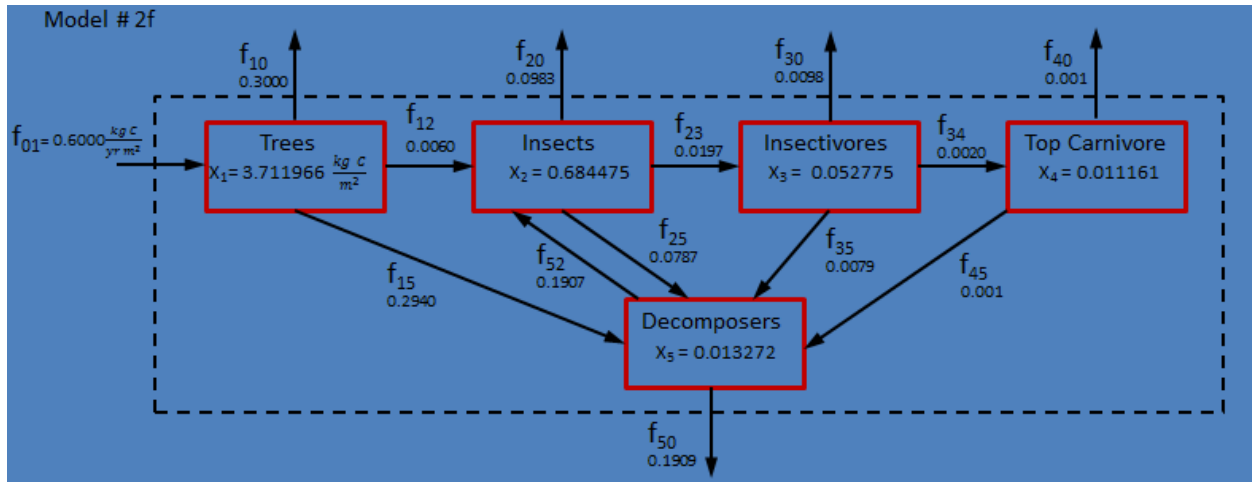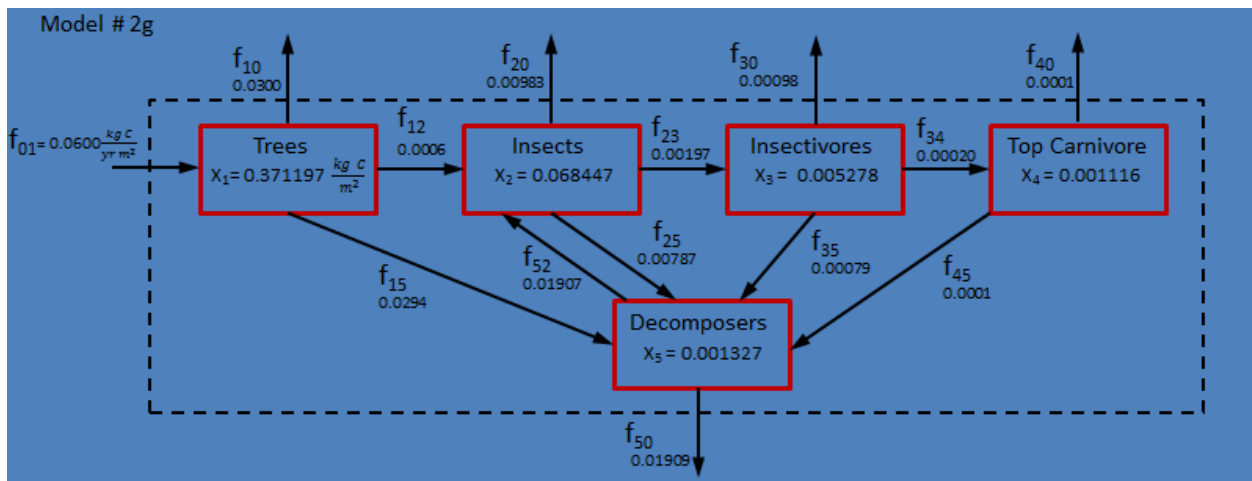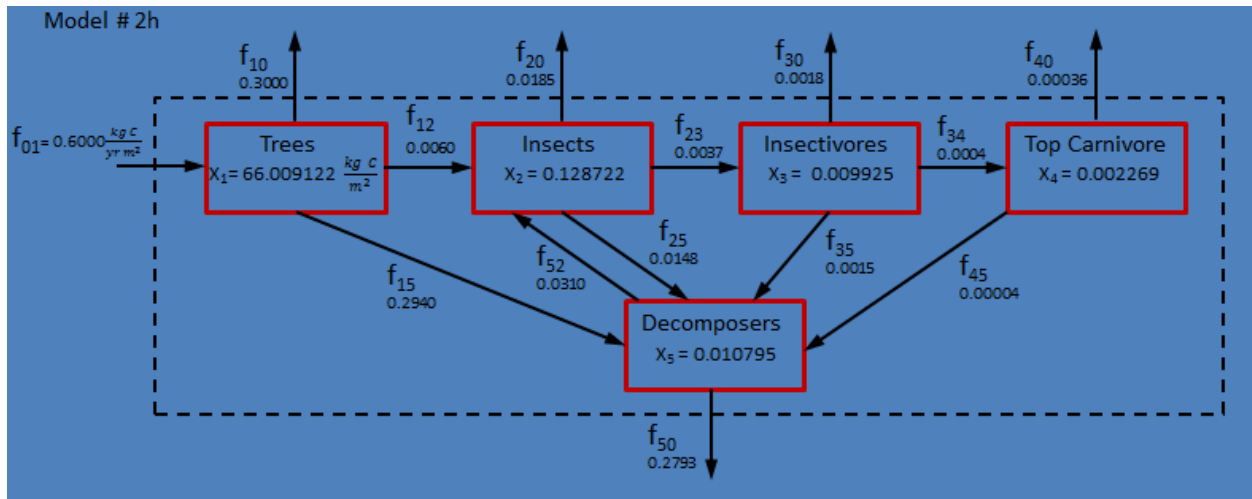

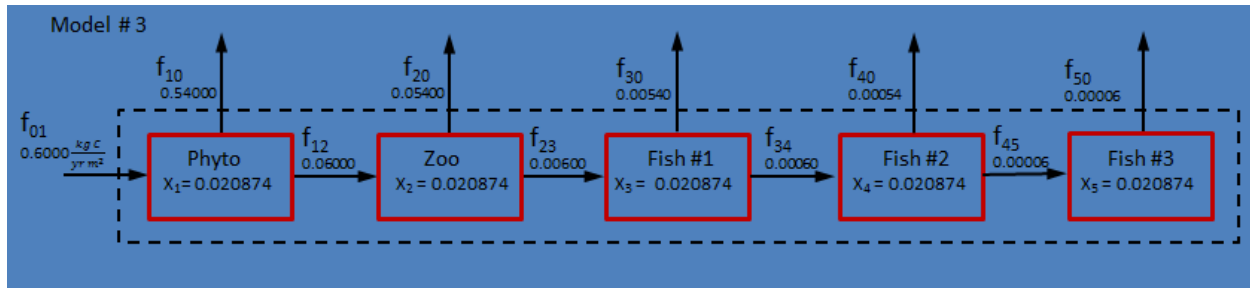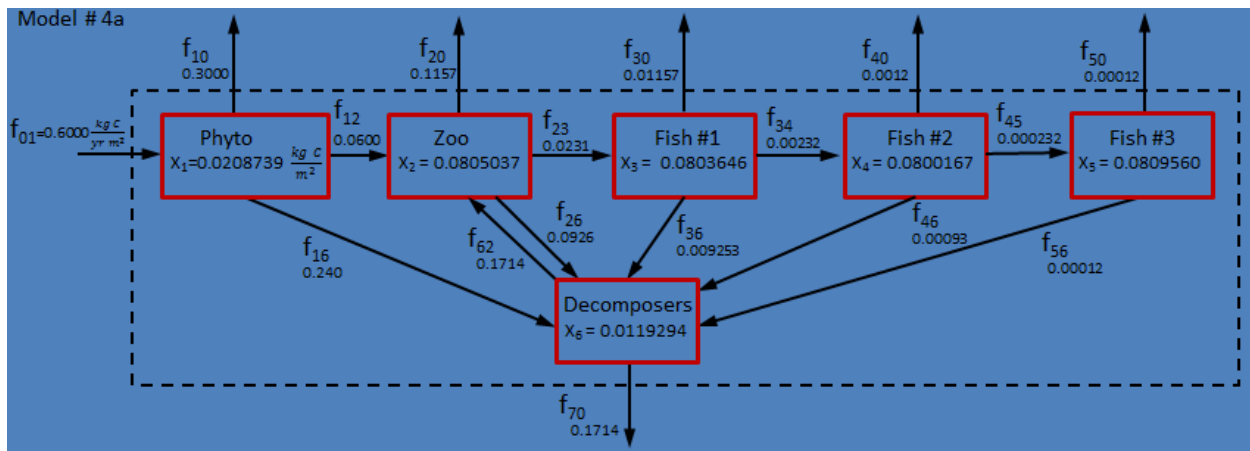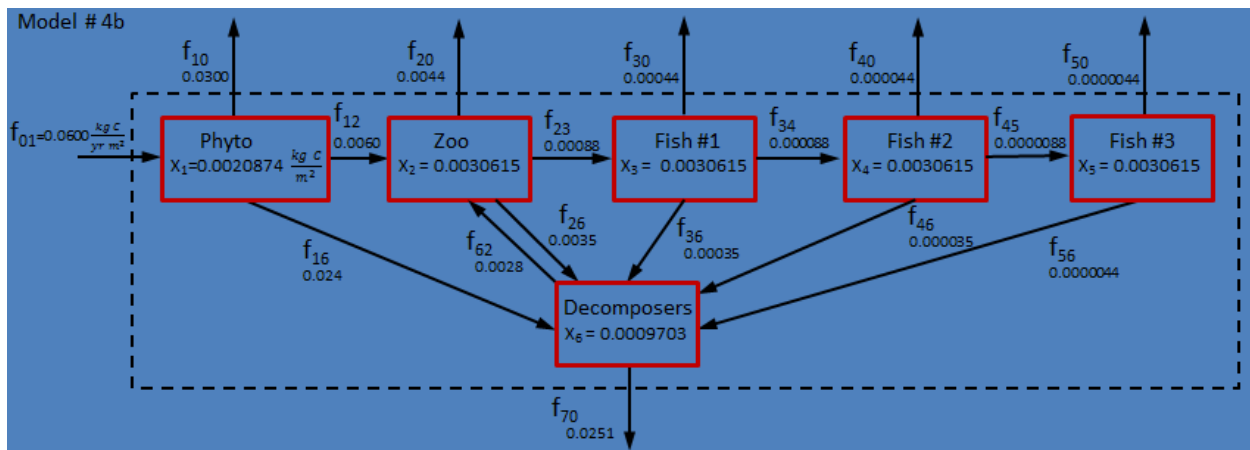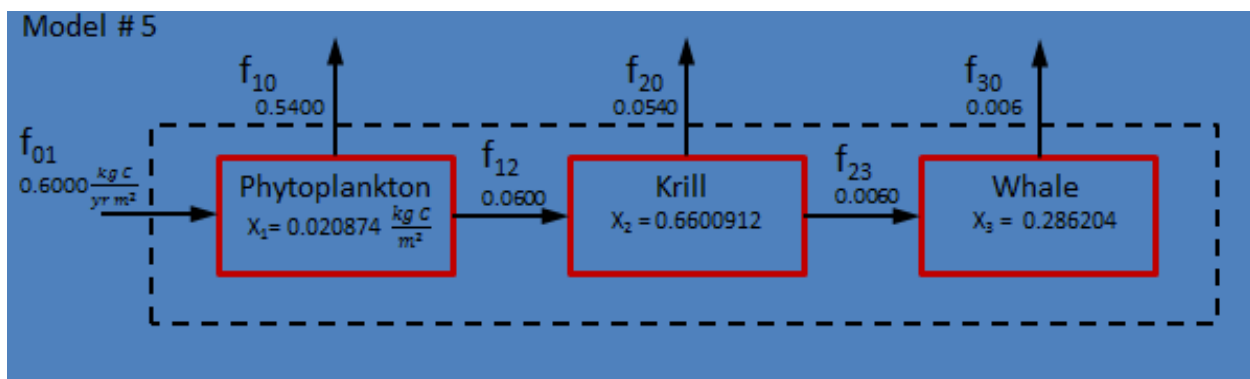



Model # 6a

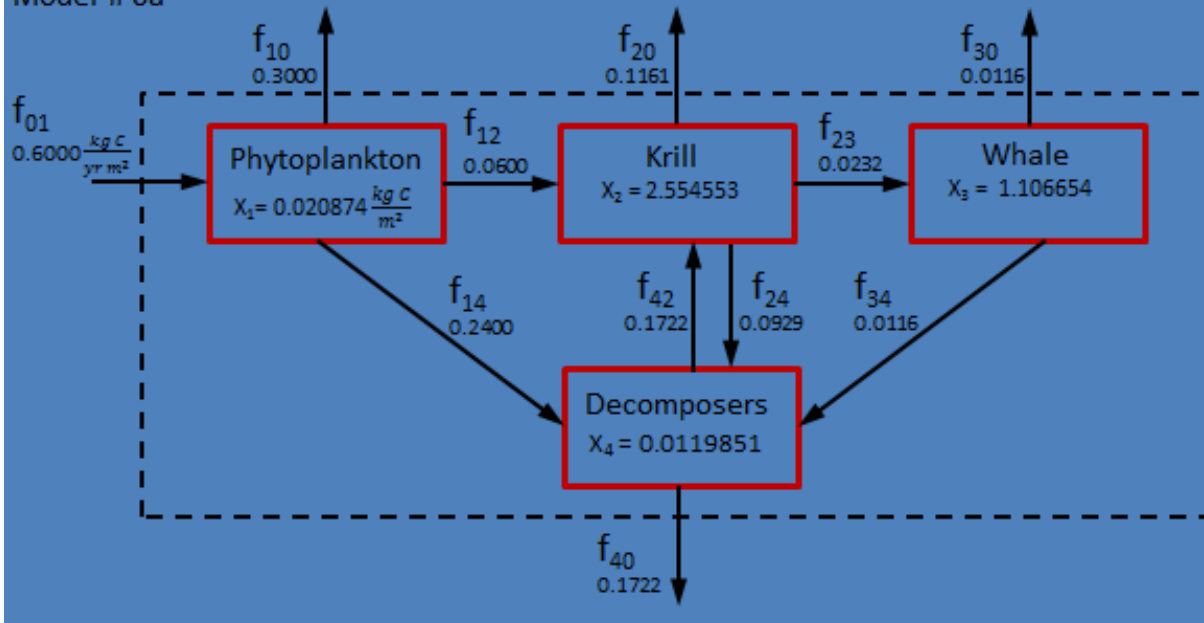

Model # 6b

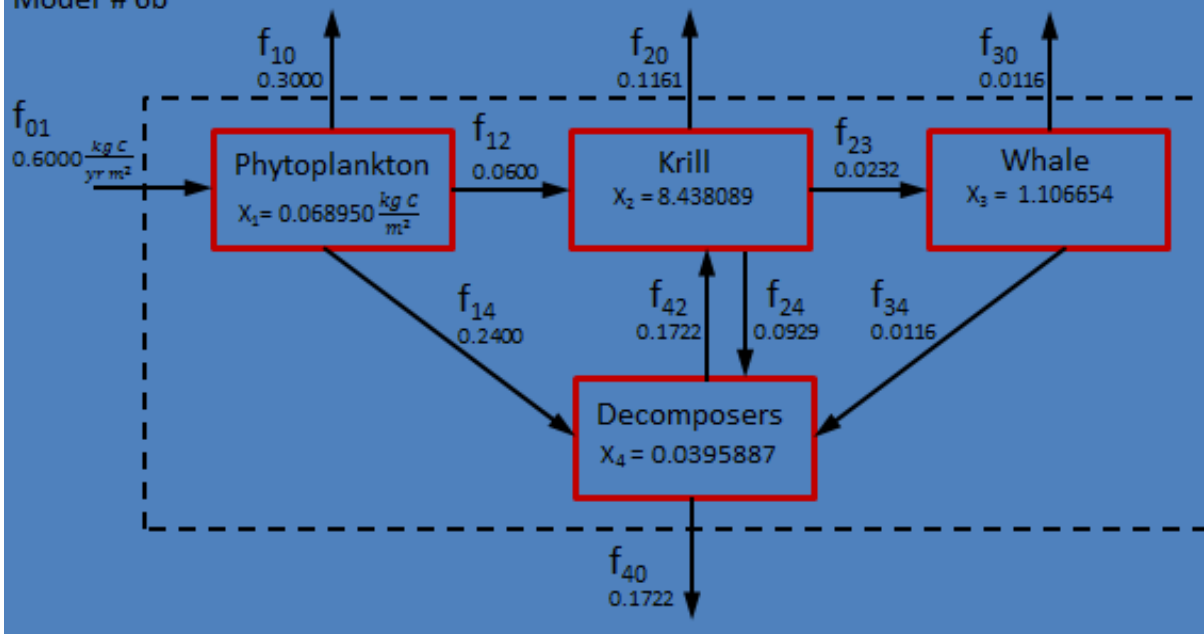

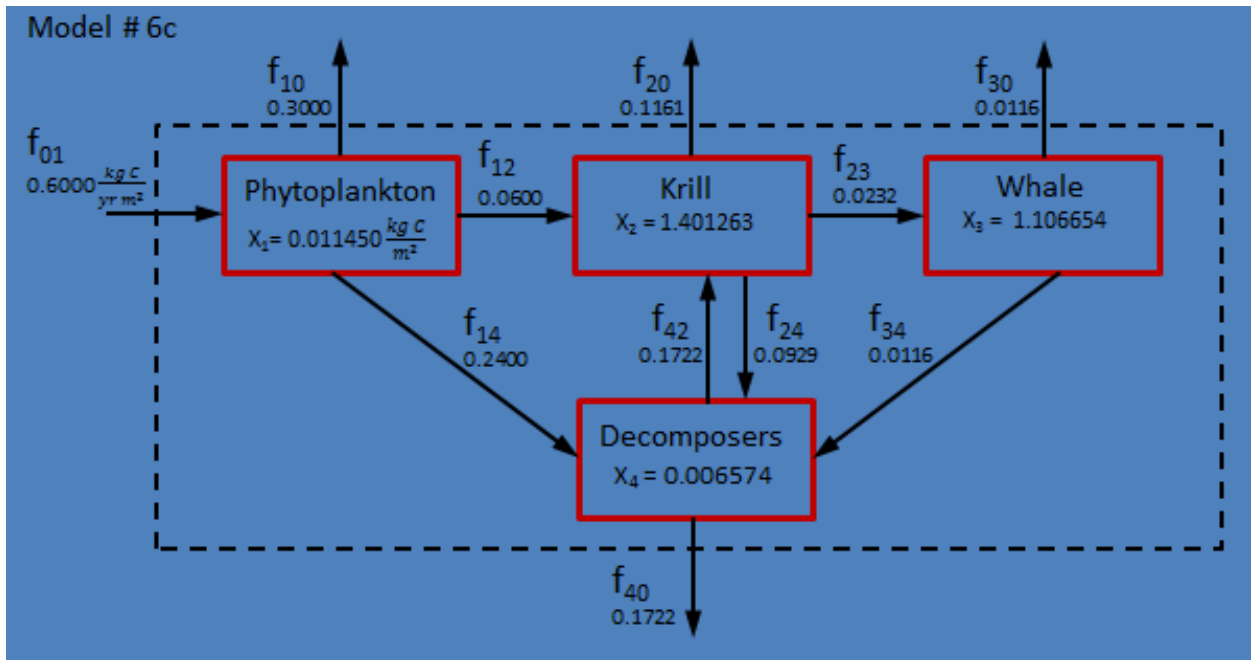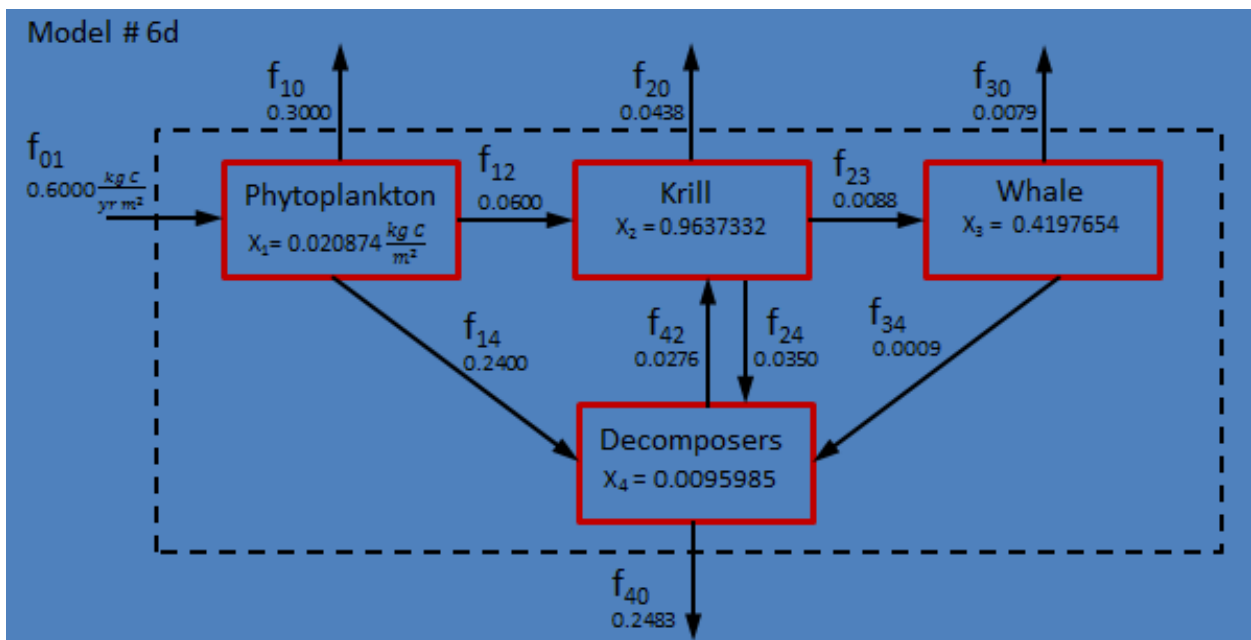

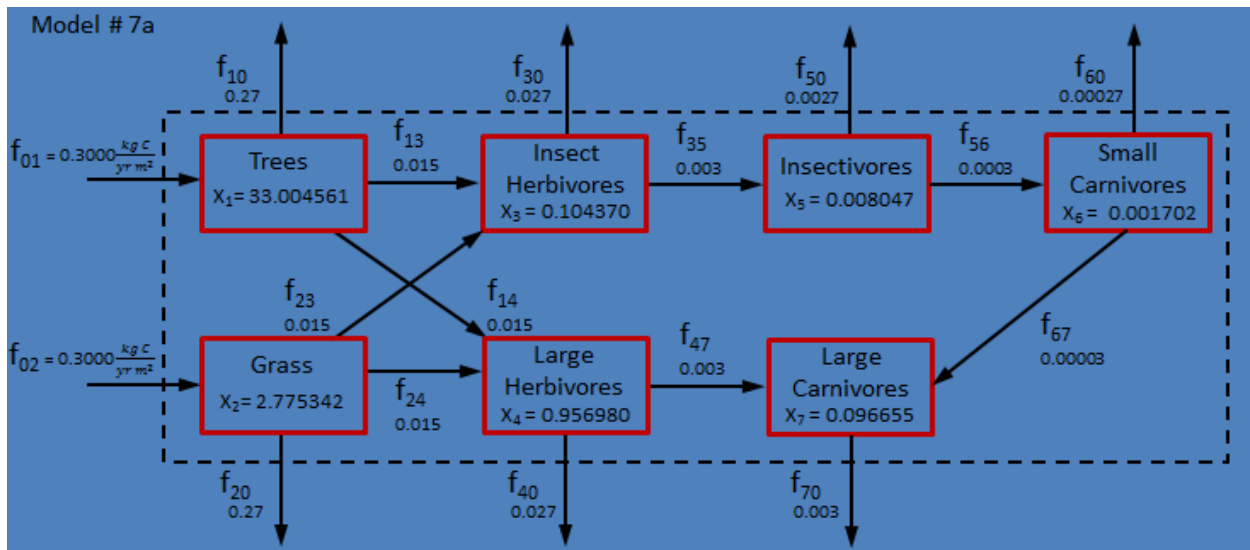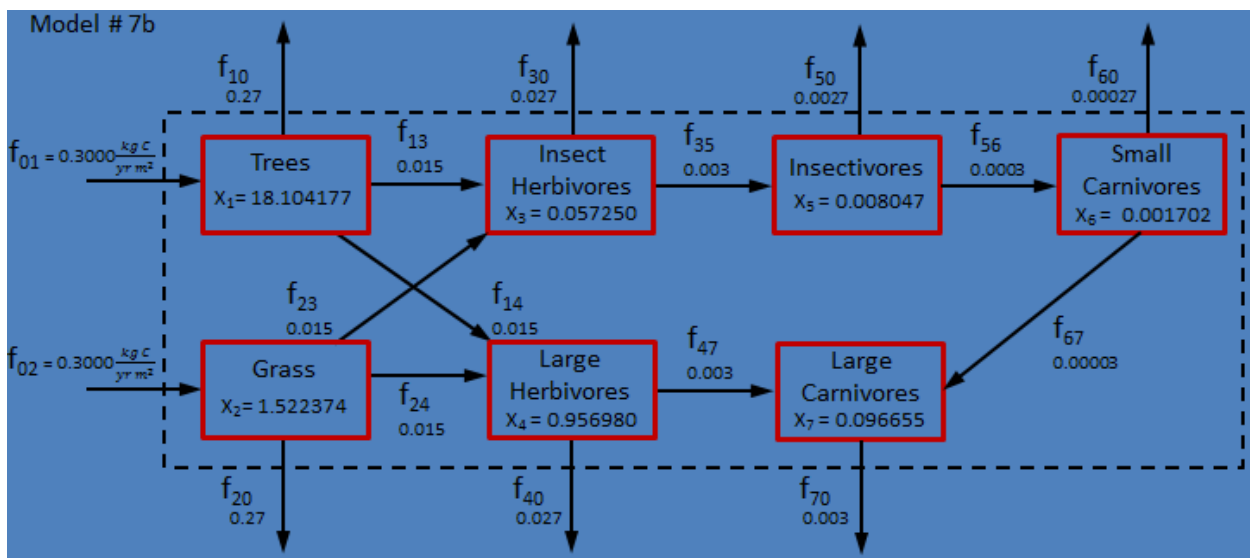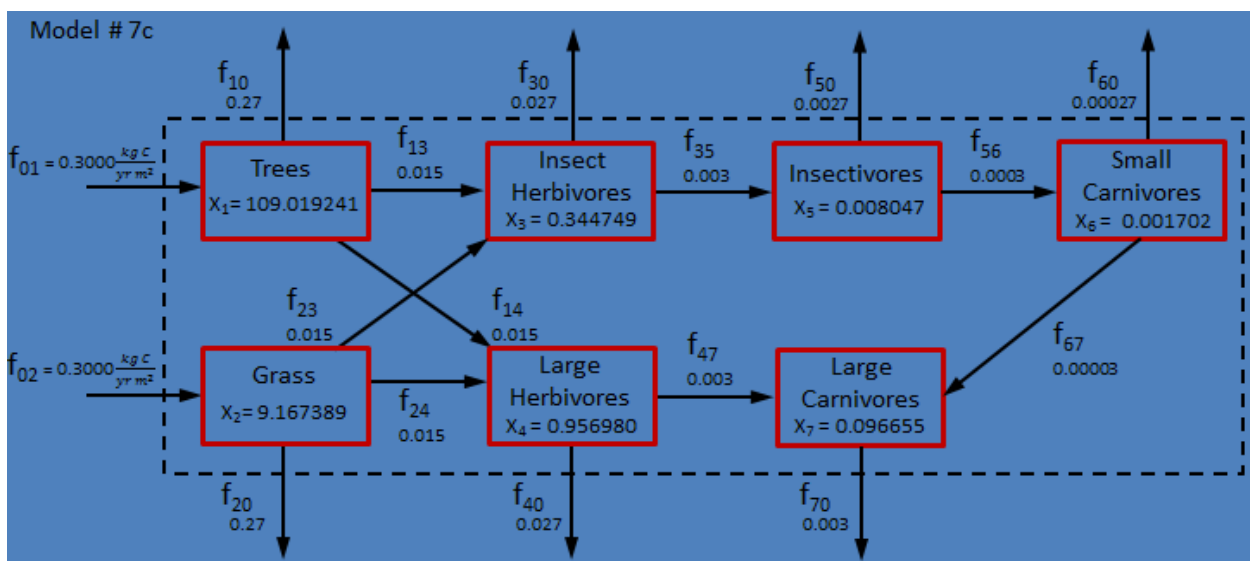

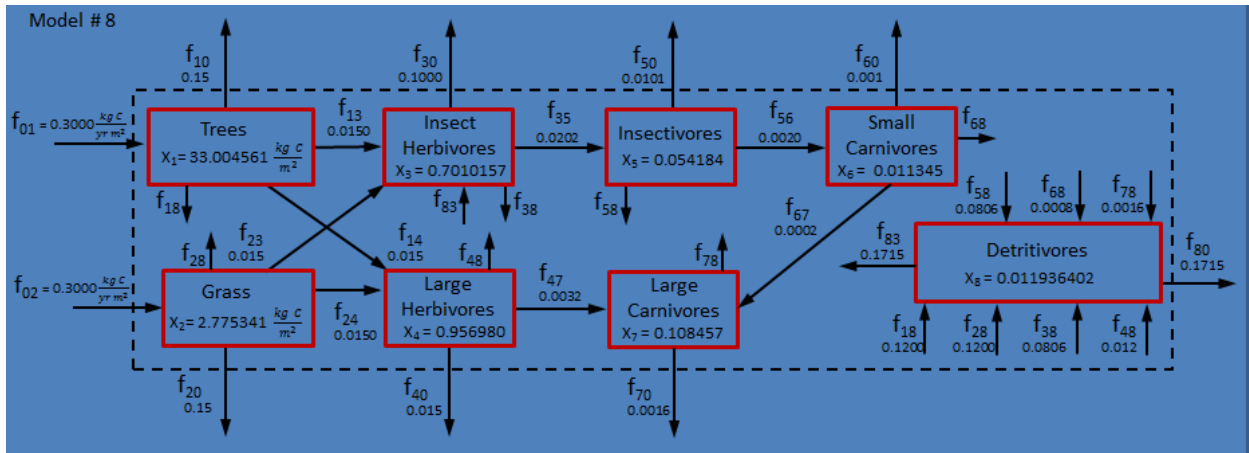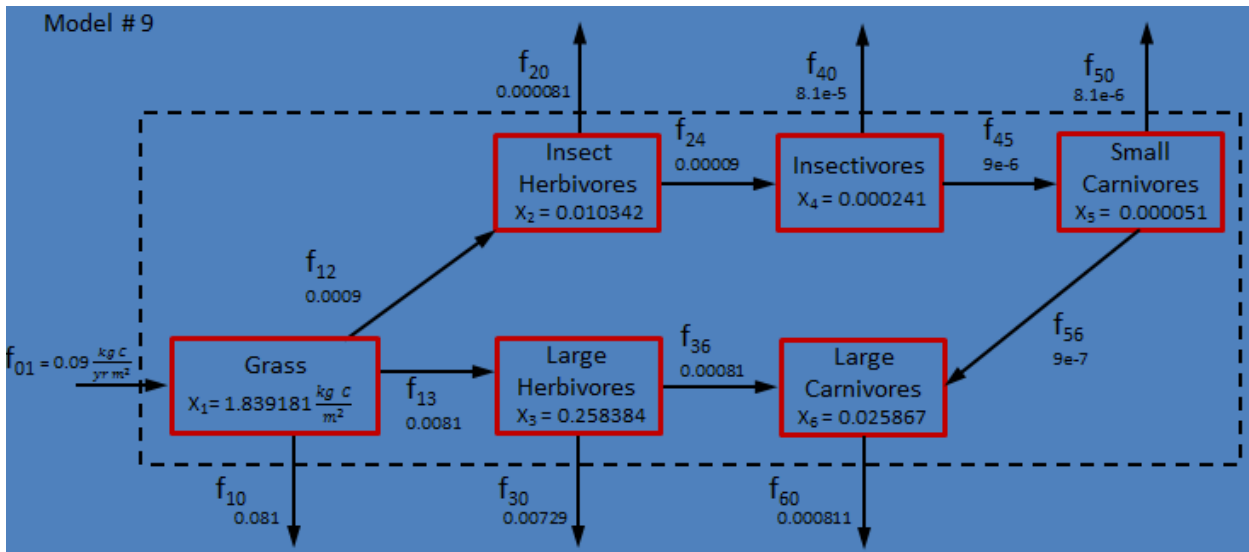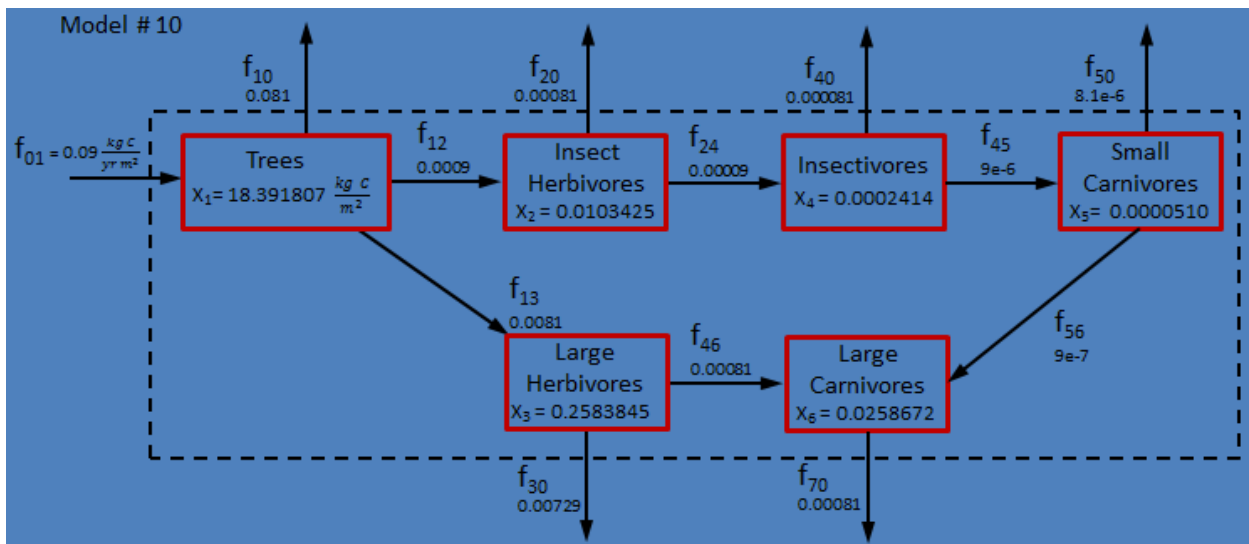

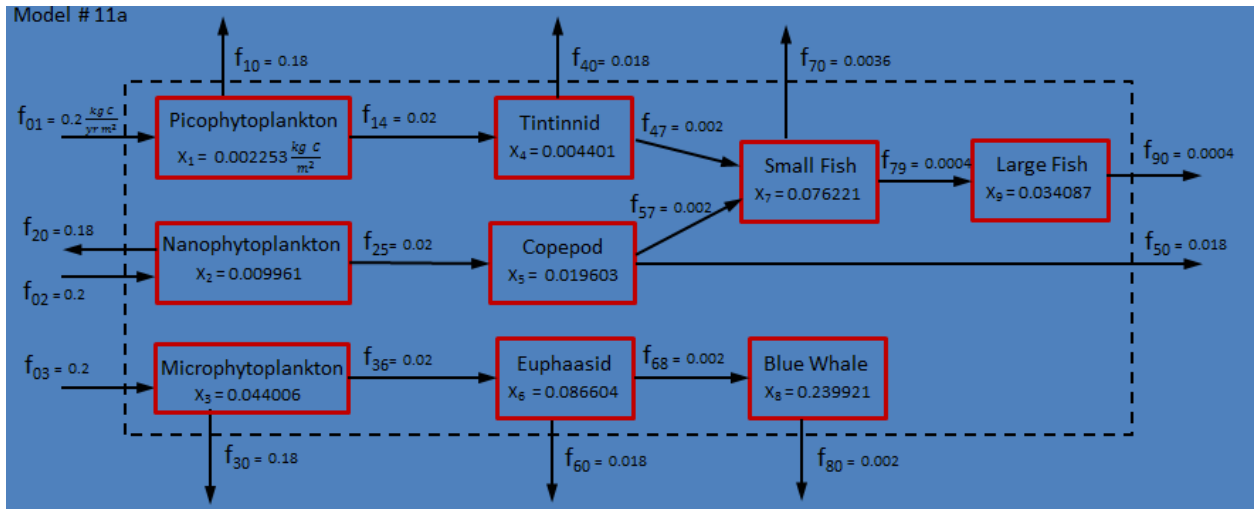

Supplement: pnas.1423502112.sapp.pdf [file pnas.1423502112.sapp.pdf]
